# Supplementary material
Source: PubMed Central journal article supplement (PMC3414259)
Supplement: NIHMS336738-supplement-1.pdf [file NIHMS336738-supplement-1.pdf]

**Supplementary Table 1. Genotyped SNPs in the Genes in the Glutathione, DNA Repair and Inflammation Pathways**

| Pathway                     | Gene Symbol | Chromosome Location | Number of SNPs Genotyped | Number of SNPs Analyzed |
|-----------------------------|-------------|---------------------|--------------------------|-------------------------|
| <b>GSH(29 genes)</b>        | ABCC1       | 16p13.1             | 32                       | 28                      |
|                             | ABCC2       | 10q24               | 12                       | 11                      |
|                             | ABCC3       | 17q21               | 14                       | 14                      |
|                             | ABCC4       | 13q31               | 68                       | 63                      |
|                             | GCLC        | 6p12                | 16                       | 13                      |
|                             | GCLM        | 1p21                | 3                        | 3                       |
|                             | GPX1        | 3p21.3              | 3                        | 1                       |
|                             | GPX2        | 14q24.1             | 3                        | 3                       |
|                             | GPX3        | 5q23                | 6                        | 6                       |
|                             | GPX5        | 6p22.1              | 3                        | 3                       |
|                             | GPX6        | 6p22.1              | 3                        | 3                       |
|                             | GPX7        | 1p32                | 2                        | 2                       |
|                             | GSR         | 8p21.1              | 7                        | 6                       |
|                             | GSS         | 20q11.2             | 7                        | 7                       |
|                             | GSTA1       | 6p12                | 3                        | 2                       |
|                             | GSTA2       | 6p12.2              | 4                        | 2                       |
|                             | GSTA3       | 6p12                | 5                        | 5                       |
|                             | GSTA4       | 6p12                | 9                        | 9                       |
|                             | GSTA5       | 6p12.1              | 6                        | 5                       |
|                             | GSTM1       | 1p13.3              | 2                        | 0                       |
|                             | GSTM2       | 1p13.3              | 1                        | 1                       |
|                             | GSTM3       | 1p13.3              | 3                        | 3                       |
|                             | GSTM4       | 1p13                | 4                        | 4                       |
|                             | GSTM5       | 1p13.3              | 7                        | 4                       |
|                             | GSTO1       | 10q25.1             | 8                        | 5                       |
|                             | GSTO2       | 10q25.1             | 10                       | 6                       |
|                             | GSTP1       | 11q13               | 9                        | 5                       |
|                             | GSTT1       | 22q11.23            | 7                        | 0                       |
|                             | GSTZ1       | 14q24.3             | 10                       | 9                       |
| <b>DNA Repair(20 genes)</b> | APEX1       | 14q11.2             | 3                        | 2                       |
|                             | ERCC1       | 19q13.32            | 5                        | 5                       |
|                             | ERCC2       | 19q13.3             | 7                        | 7                       |
|                             | LIG1        | 19q13.2-q13.3       | 5                        | 5                       |
|                             | MGMT        | 10q26               | 42                       | 38                      |
|                             | MLH1        | 3p22.3              | 2                        | 2                       |
|                             | MSH2        | 2p21                | 6                        | 6                       |
|                             | MSH3        | 5q11-q12            | 16                       | 15                      |
|                             | MSH6        | 2p16                | 9                        | 9                       |
|                             | OGG1        | 3p26                | 4                        | 3                       |
|                             | PARP        | 1q41-q42            | 13                       | 12                      |
|                             | PCNA        | 20pter-p12          | 1                        | 1                       |
|                             | POLB        | 8p12-p11            | 1                        | 1                       |
|                             | RAD50       | 5q23-q31            | 3                        | 3                       |
|                             | RAD51       | 15q15.1             | 3                        | 2                       |

|                              |       |              |            |            |
|------------------------------|-------|--------------|------------|------------|
|                              | RAD52 | 12p13-p12.2  | 10         | 10         |
|                              | RRM1  | 11p15.5      | 6          | 6          |
|                              | XPA   | 9q22.3       | 5          | 5          |
|                              | XPC   | 3p25         | 6          | 6          |
|                              | XRCC1 | 19q13.2      | 5          | 5          |
| <b>Inflammation(8 genes)</b> | IL10  | 1q31-q32     | 7          | 7          |
|                              | IL1B  | 2q14         | 5          | 5          |
|                              | IL1RN | 2q14.2       | 7          | 6          |
|                              | IL6   | 7p21         | 9          | 7          |
|                              | IL8   | 4q13-q21     | 2          | 2          |
|                              | LTA   | 6p21.3       | 5          | 4          |
|                              | PTGS2 | 1q25.2-q25.3 | 9          | 7          |
|                              | TNF   | 6p21.3       | 7          | 6          |
| <b>Total</b>                 |       |              | <b>470</b> | <b>405</b> |
