# Supplementary material
Source: PubMed Central journal article supplement (PMC3414259)
Supplement: NIHMS336738-supplement-2.pdf [file NIHMS336738-supplement-2.pdf]

| Supplementary Table E2. SNP-Based Analyses for COPD Patients with Lung Cancer and Healthy Control Dataset |       |            |                    |                   |                    |                   |                     |                    |                                         |
|-----------------------------------------------------------------------------------------------------------|-------|------------|--------------------|-------------------|--------------------|-------------------|---------------------|--------------------|-----------------------------------------|
| Pathway                                                                                                   | Gene  | RS ID      | OR(Additive Model) | P(Additive Model) | OR(Dominant Model) | P(Dominant Model) | OR(Recessive Model) | P(Recessive Model) | Minimum P Value in Three Genetic Models |
| DNA                                                                                                       | XRCC1 | rs1001581  | 0.908678864        | 0.342355885       | 0.841686666        | 0.231969491       | 0.958777924         | 0.827042727        | 0.231969491                             |
| GSH                                                                                                       | GSTM4 | rs1010167  | 1.002642877        | 0.978510929       | 0.971496021        | 0.838482382       | 1.062789784         | 0.74674874         | 0.74674874                              |
| Inflammation                                                                                              | LTA   | rs1041981  | 0.962200926        | 0.707870823       | 0.815271391        | 0.147144041       | 1.34826152          | 0.159065408        | 0.147144041                             |
| GSH                                                                                                       | GSTZ1 | rs1046428  | 0.964919056        | 0.780091042       | 0.90264166         | 0.480645914       | 1.571181732         | 0.270776794        | 0.270776794                             |
| GSH                                                                                                       | GPX7  | rs1047635  | 0.846686047        | 0.093466549       | 0.787544008        | 0.120179805       | 0.819858175         | 0.244691525        | 0.093466549                             |
| DNA                                                                                                       | APEX1 | rs1048945  | 1.010565044        | 0.963424462       | 0.94483333         | 0.808416713       | 1.0308358271        | 0.043875107        | 0.043875107                             |
| GSH                                                                                                       | GSTO2 | rs10491045 | 0.839533171        | 0.411817091       | 0.791219868        | 0.287920283       | 0.7679811487        | 0.871441602        | 0.287920283                             |
| GSH                                                                                                       | ABCC4 | rs10508017 | 0.972322453        | 0.775019189       | 0.962617019        | 0.806375296       | 0.964005475         | 0.824994558        | 0.775019189                             |
| GSH                                                                                                       | ABCC4 | rs10509023 | 1.312183872        | 0.067349838       | 1.295308904        | 0.123059604       | 2.313574307         | 0.112093668        | 0.067349838                             |
| GSH                                                                                                       | ABCC3 | rs1051640  | 1.216054938        | 0.12356993        | 1.252477365        | 0.120227869       | 1.255325754         | 0.57078067         | 0.120227869                             |
| DNA                                                                                                       | RAD52 | rs1051669  | 0.998961486        | 0.992794153       | 0.994747251        | 0.970743004       | 1.015198278         | 0.958796492        | 0.958796492                             |
| DNA                                                                                                       | MGMT  | rs10741191 | 1.133249749        | 0.219607121       | 1.175952623        | 0.269323792       | 1.177941417         | 0.389256901        | 0.219607121                             |
| DNA                                                                                                       | MGMT  | rs10741198 | 1.038147543        | 0.707822915       | 1.010461728        | 0.940672891       | 1.14082145          | 0.514656692        | 0.514656692                             |
| DNA                                                                                                       | RAD52 | rs10744729 | 0.928827149        | 0.463785923       | 1.024824503        | 0.8712193         | 0.76594199          | 0.137441208        | 0.137441208                             |
| DNA                                                                                                       | MGMT  | rs10764901 | 1.106417314        | 0.375573007       | 1.105164897        | 0.473247819       | 1.249721177         | 0.444863368        | 0.375573007                             |
| GSH                                                                                                       | GSTA1 | rs10948723 | 0.93354997         | 0.478622449       | 0.851688496        | 0.274208638       | 1.004366354         | 0.980125039        | 0.274208638                             |
| DNA                                                                                                       | MGMT  | rs11016879 | 0.910507274        | 0.345156076       | 0.838591787        | 0.214774688       | 0.971690936         | 0.881770119        | 0.214774688                             |
| DNA                                                                                                       | MGMT  | rs11016884 | 1.162098073        | 0.152859773       | 1.223440778        | 0.137822283       | 1.168472372         | 0.498902945        | 0.137822283                             |
| DNA                                                                                                       | MGMT  | rs11016887 | 1.029278009        | 0.824258104       | 1.004826253        | 0.974552326       | 1.289508311         | 0.550445168        | 0.550445168                             |
| DNA                                                                                                       | RAD52 | rs11064607 | 1.041124971        | 0.69291882        | 1.040123126        | 0.796030558       | 1.073936134         | 0.693841221        | 0.69291882                              |
| GSH                                                                                                       | ABCC1 | rs11075295 | 0.826051888        | 0.156063616       | 0.760900786        | 0.080093561       | 1.124718752         | 0.77804561         | 0.080093561                             |
| GSH                                                                                                       | ABCC2 | rs11190291 | 1.194737979        | 0.149972981       | 1.202488184        | 0.207894186       | 1.470859019         | 0.278784807        | 0.149972981                             |
| GSH                                                                                                       | GSTO1 | rs11191975 | 0.980038701        | 0.895875874       | 0.91864517         | 0.620927537       | 1.99257434          | 0.252019703        | 0.252019703                             |
| GSH                                                                                                       | GSTO2 | rs11191990 | 1.113691351        | 0.75055133        | 1.070611751        | 0.848615449       | 3.943730903         | 0.4616951          | 0.4616951                               |
| DNA                                                                                                       | XPC   | rs1124303  | 1.104598265        | 0.582046413       | 1.108869618        | 0.585023635       | 1.173538418         | 0.873596761        | 0.582046413                             |
| GSH                                                                                                       | GSTP1 | rs1138272  | 0.649512966        | 0.01684454        | 0.59833919         | 0.008185689       | 1.253341196         | 0.774616401        | 0.008185689                             |
| Inflammation                                                                                              | IL1B  | rs1143627  | 0.857578057        | 0.144697173       | 0.781450517        | 0.077797983       | 0.938267863         | 0.776547993        | 0.077797983                             |
| Inflammation                                                                                              | IL1B  | rs1143630  | 0.987406513        | 0.954129638       | 0.957236508        | 0.850361272       | 1.222565189         | 0.50639944         | 0.50639944                              |
| Inflammation                                                                                              | IL1B  | rs1143633  | 1.043534475        | 0.693421192       | 1.052479253        | 0.715955035       | 1.064871385         | 0.773817898        | 0.693421192                             |
| Inflammation                                                                                              | IL1B  | rs1143634  | 0.9462726          | 0.62867055        | 0.902323398        | 0.462933411       | 1.090672414         | 0.767381912        | 0.462933411                             |
| GSH                                                                                                       | GSTO1 | rs1147611  | 1.266235184        | 0.022937872       | 1.356428015        | 0.030697333       | 1.350333596         | 0.135637844        | 0.022937872                             |
| GSH                                                                                                       | GSTO1 | rs11509438 | 1.122899477        | 0.67700948        | 1.094025201        | 0.752932929       | NA                  | NA                 | 0.67700948                              |
| DNA                                                                                                       | MGMT  | rs11511217 | 0.991920405        | 0.941776693       | 0.943828628        | 0.680537999       | 1.171579641         | 0.548679544        | 0.548679544                             |
| GSH                                                                                                       | ABCC4 | rs11568643 | 0.895939238        | 0.545548015       | 0.891278249        | 0.547170311       | 0.84834337          | 0.8634105          | 0.545548015                             |
| GSH                                                                                                       | ABCC4 | rs11568658 | 0.915169812        | 0.755410213       | 1.003214073        | 0.99152353        | 9.62E-07            | 0.970782432        | 0.755410213                             |
| GSH                                                                                                       | ABCC4 | rs11568663 | 1.075361519        | 0.622301043       | 1.038653566        | 0.814566075       | 1.87216405          | 0.276357759        | 0.276357759                             |
| DNA                                                                                                       | MGMT  | rs11592158 | 1.091857769        | 0.464591994       | 1.117298114        | 0.436801594       | 1.074035879         | 0.832089863        | 0.436801594                             |
| GSH                                                                                                       | ABCC2 | rs11597282 | 0.885520699        | 0.670238283       | 0.885520699        | 0.670238283       | NA                  | NA                 | 0.670238283                             |
| DNA                                                                                                       | ERRC1 | rs1161615  | 0.956370098        | 0.664224798       | 0.926731012        | 0.591328763       | 0.981263032         | 0.927527183        | 0.591328763                             |
| GSH                                                                                                       | GSTM5 | rs11807    | 1.072702635        | 0.562021578       | 1.105588883        | 0.483415414       | 0.987894268         | 0.971789449        | 0.483415414                             |
| DNA                                                                                                       | MGMT  | rs11813056 | 1.397764872        | 0.012943869       | 1.412837278        | 0.023166908       | 2.031509894         | 0.111238976        | 0.012943869                             |
| DNA                                                                                                       | MGMT  | rs11813363 | 1.162098073        | 0.152859773       | 1.223440778        | 0.137822283       | 1.168472372         | 0.498902945        | 0.137822283                             |
| DNA                                                                                                       | PARP  | rs11842915 | 1.116279727        | 0.396189325       | 1.140954813        | 0.231151769       | 1.122204138         | 0.771974348        | 0.396189325                             |
| GSH                                                                                                       | ABCC1 | rs11864374 | 1.01779813         | 0.874824564       | 1.035754512        | 0.803325777       | 0.972650677         | 0.920549762        | 0.803325777                             |
| GSH                                                                                                       | ABCC4 | rs1189428  | 0.736030699        | 0.480124024       | 1.204105748        | 0.230882554       | 0.978258202         | 0.898986416        | 0.230882554                             |
| GSH                                                                                                       | ABCC4 | rs1189446  | 1.031922986        | 0.809536595       | 1.020886443        | 0.889471941       | 1.173901679         | 0.701554687        | 0.701554687                             |
| GSH                                                                                                       | ABCC4 | rs1189457  | 0.926731784        | 0.453620388       | 0.927961805        | 0.616950363       | 0.872577367         | 0.45839931         | 0.453620388                             |
| GSH                                                                                                       | ABCC4 | rs1189465  | 0.99886886         | 0.998964186       | 1.201628387        | 0.215322667       | 0.748266578         | 0.120649886        | 0.120649886                             |
| GSH                                                                                                       | ABCC4 | rs1189470  | 1.008181764        | 0.949257079       | 1.056773384        | 0.704323617       | 0.692952166         | 0.385867943        | 0.385867943                             |
| GSH                                                                                                       | GSTA3 | rs11961374 | 1.547707719        | 0.255924554       | 1.547707719        | 0.255924554       | NA                  | NA                 | 0.255924554                             |
| GSH                                                                                                       | GSTA1 | rs11969435 | 0.933276734        | 0.47672451        | 0.851434317        | 0.273341454       | 1.003782542         | 0.982774219        | 0.273341454                             |
| DNA                                                                                                       | MGMT  | rs12219606 | 1.00829475         | 0.93326777        | 1.042479559        | 0.773434338       | 0.961741744         | 0.832723407        | 0.773434338                             |
| DNA                                                                                                       | MGMT  | rs12220762 | 0.957492823        | 0.892346528       | 0.994833325        | 0.9703322         | 0.811020001         | 0.38937941         | 0.38937941                              |
| DNA                                                                                                       | MGMT  | rs12243174 | 0.94204401         | 0.512982123       | 0.961496657        | 0.784896469       | 0.787614445         | 0.451330298        | 0.451330298                             |
| DNA                                                                                                       | MGMT  | rs12256667 | 0.876485935        | 0.348187658       | 0.890476373        | 0.453484737       | 0.594240068         | 0.335845643        | 0.335845643                             |
| GSH                                                                                                       | GSTM4 | rs12405275 | 1.285141781        | 0.264670946       | 1.253038082        | 0.333345516       | 6.185739966         | 0.267225374        | 0.264670946                             |
| DNA                                                                                                       | MGMT  | rs12413023 | 1.008382476        | 0.932784913       | 1.249649004        | 0.133684252       | 0.741999503         | 0.097680203        | 0.097680203                             |
| DNA                                                                                                       | MSH3  | rs12513549 | 1.346905389        | 0.066375569       | 1.314357744        | 0.109538992       | 3.886554088         | 0.106026613        | 0.066375569                             |
| DNA                                                                                                       | MSH3  | rs12521232 | 1.224719454        | 0.185952734       | 1.219788555        | 0.230246188       | 1.77758028          | 0.370892133        | 0.185952734                             |
| GSH                                                                                                       | GCLC  | rs12524494 | 0.844284115        | 0.438369642       | 0.877986533        | 0.578515706       | 0.274244893         | 0.263921488        | 0.263921488                             |
| GSH                                                                                                       | GCLC  | rs12524550 | 2.107213164        | 0.022790943       | 2.097809511        | 0.026251741       | NA                  | NA                 | 0.022790943                             |
| GSH                                                                                                       | GCLC  | rs12525474 | 1.210297874        | 0.179395523       | 1.216285478        | 0.220677642       | 1.551142249         | 0.377669145        | 0.179395523                             |
| GSH                                                                                                       | GSTM5 | rs12743015 | 1.01773671         | 0.955443695       | 0.963302271        | 0.908898273       | NA                  | NA                 | 0.908898273                             |
| DNA                                                                                                       | MGMT  | rs12763287 | 1.099940206        | 0.484372503       | 1.176179546        | 0.282087316       | 0.594034491         | 0.321168703        | 0.282087316                             |
| DNA                                                                                                       | RRM1  | rs12806998 | 0.895550832        | 0.290617064       | 0.853693252        | 0.256005795       | 0.80956184          | 0.743875642        | 0.256005795                             |
| DNA                                                                                                       | RAD52 | rs12827646 | 1.04077426         | 0.775471707       | 1.108832722        | 0.501106132       | 0.48480889          | 0.21528975         | 0.21528975                              |
| DNA                                                                                                       | MGMT  | rs12917    | 0.991901318        | 0.955384987       | 1.020245747        | 0.896155471       | 0.531388705         | 0.391481106        | 0.391481106                             |
| GSH                                                                                                       | ABCC1 | rs12924212 | 0.897351799        | 0.284385878       | 0.889857601        | 0.419786857       | 0.830581566         | 0.335468879        | 0.284385878                             |
| DNA                                                                                                       | MSH2  | rs12998837 | 0.968378244        | 0.828605349       | 0.940380779        | 0.706073312       | 1.318944362         | 0.624862327        | 0.624862327                             |
| DNA                                                                                                       | ERRC2 | rs13181    | 0.806016569        | 0.031453126       | 0.753322012        | 0.04423926        | 0.747562442         | 0.146999832        | 0.031453126                             |
| GSH                                                                                                       | GSTM3 | rs1332018  | 1.0261276          | 0.799443956       | 1.012850941        | 0.931487068       | 1.069376178         | 0.719303956        | 0.719303956                             |
| GSH                                                                                                       | ABCC1 | rs152022   | 0.901643797        | 0.397473695       | 1.015031868        | 0.919293454       | 0.397637009         | 0.011576628        | 0.011576628                             |
| GSH                                                                                                       | ABCC1 | rs152023   | 0.870550168        | 0.184379735       | 0.937932199        | 0.643948597       | 0.605145438         | 0.032169331        | 0.032169331                             |
| GSH                                                                                                       | ABCC1 | rs152028   | 1.015838637        | 0.881980462       | 1.039439734        | 0.780739508       | 0.966645376         | 0.886496421        | 0.780739508                             |
| GSH                                                                                                       | ABCC3 | rs1541392  | 1.157652779        | 0.304492945       | 1.135819581        | 0.423126861       | 1.744064163         | 0.272651935        | 0.272651935                             |
| GSH                                                                                                       | ABCC4 | rs1564351  | 1.204367436        | 0.260277664       | 1.184068446        | 0.34407649        | 2.162131832         | 0.293502881        | 0.260277664                             |
| GSH                                                                                                       | GSTO1 | rs156999   | 1.01127314         | 0.895144975       | 0.999507673        | 0.997473474       | 1.218111756         | 0.659605439        | 0.659605439                             |
| GSH                                                                                                       | GSTO2 | rs157077   | 1.177603868        | 0.093423533       | 1.427610391        | 0.018476055       | 1.045527589         | 0.794591938        | 0.093423533                             |
| DNA                                                                                                       | GSTO2 | rs157080   | 1.220673845        | 0.05912975        | 1.39709791         | 0.016834154       | 1.041377779         | 0.859685997        | 0.05912975                              |
| DNA                                                                                                       | OGG1  | rs159154   | 1.012136903        | 0.908423769       | 1.062656459        | 0.662267392       | 0.897566207         | 0.638542078        | 0.638542078                             |
| DNA                                                                                                       | ERRC2 | rs1618536  | 1.118385981        | 0.251506127       | 1.185781754        | 0.256626948       | 1.131573533         | 0.471178469        | 0.251506127                             |
| DNA                                                                                                       | RRM1  | rs1662162  | 0.762295467        | 0.11717344        | 0.691715           | 0.054315324       | 1.627430418         | 0.485100054        | 0.054315324                             |
| GSH                                                                                                       | ABCC4 | rs1678374  | 1.065497179        | 0.527304911       | 1.042478495        | 0.770741711       | 1.174359944         | 0.407923535        | 0.407923535                             |
| GSH                                                                                                       | GSTP1 | rs1695     | 1.001203426        | 0.99092307        | 0.90739984         | 0.486322418       | 1.304269591         | 0.24478526         | 0.24478526                              |
| GSH                                                                                                       | ABCC1 | rs16967755 | 1.215991339        | 0.09348199        | 1.449392964        | 0.010130762       | 0.724801926         | 0.291748689        | 0.010130762                             |
| GSH                                                                                                       | ABCC4 | rs17189376 | 0.906738364        | 0.40247312        | 0.933238033        | 0.627830264       | 0.697241629         | 0.24754287         |                                         |

|              |       |            |              |             |             |             |             |             |             |
|--------------|-------|------------|--------------|-------------|-------------|-------------|-------------|-------------|-------------|
| GSH          | GSS   | rs2025096  | 1.116528024  | 0.36855588  | 1.126175891 | 0.411682828 | 1.229819241 | 0.557164142 | 0.36855588  |
| DNA          | MGMT  | rs2026975  | 0.983699574  | 0.879853587 | 0.967273464 | 0.811600784 | 1.021098132 | 0.935111155 | 0.811600784 |
| DNA          | MGMT  | rs2026976  | 1.030711177  | 0.776540966 | 1.14222487  | 0.342347884 | 0.800671863 | 0.340053505 | 0.340053505 |
| GSH          | GPX5  | rs2064424  | 1.345823847  | 0.067950058 | 1.336662346 | 0.106788653 | 2.414332571 | 0.163958864 | 0.067950058 |
| Inflammation | IL6   | rs2066992  | 0.815957258  | 0.396139703 | 0.814982411 | 0.416149721 | 0.573292291 | 0.68049145  | 0.396139703 |
| Inflammation | IL6   | rs2069835  | 0.744507099  | 0.196034985 | 0.777902816 | 0.288828294 | 6.61E-07    | 0.974224033 | 0.196034985 |
| Inflammation | IL6   | rs2069840  | 1.120055219  | 0.26212948  | 1.155671643 | 0.30217049  | 1.171998823 | 0.441169514 | 0.26212948  |
| Inflammation | IL6   | rs2069843  | 1.225260643  | 0.525523434 | 1.324181738 | 0.397346947 | NA          | NA          | 0.397346947 |
| Inflammation | IL6   | rs2069852  | 1.082512448  | 0.803296231 | 1.082512448 | 0.803296231 | NA          | NA          | 0.803296231 |
| Inflammation | IL6   | rs2069861  | 0.753632754  | 0.069825978 | 0.750489081 | 0.092164824 | 0.50112016  | 0.279873931 | 0.069825978 |
| DNA          | MSH6  | rs2072447  | 1.051829188  | 0.650838562 | 1.011995826 | 0.48581185  | 0.930259698 | 0.793325656 | 0.48581185  |
| DNA          | OGG1  | rs2072668  | 0.950114542  | 0.667285278 | 0.903237817 | 0.476685185 | 1.155134545 | 0.656590052 | 0.476685185 |
| GSH          | ABCC1 | rs2074085  | 1.242888596  | 0.165802898 | 1.270746501 | 0.166228916 | 1.354851972 | 0.612530846 | 0.165802898 |
| GSH          | GPX6  | rs2078439  | 1.335245433  | 0.072886372 | 1.32365987  | 0.114808265 | 2.414332571 | 0.163958864 | 0.072886372 |
| GSH          | GCLC  | rs2100375  | 0.775860612  | 0.022902315 | 0.779762253 | 0.074913976 | 0.566775871 | 0.038720169 | 0.022902315 |
| GSH          | ABCC1 | rs212081   | 1.042610043  | 0.683116404 | 1.03059068  | 0.83325354  | 1.106050772 | 0.613915592 | 0.613915592 |
| GSH          | ABCC1 | rs212082   | 0.89597039   | 0.38968773  | 0.862982968 | 0.317183233 | 1.007426724 | 0.984971867 | 0.317183233 |
| GSH          | ABCC1 | rs212087   | 1.293769121  | 0.012597217 | 1.308371538 | 0.073736345 | 1.539449079 | 0.021088869 | 0.012597217 |
| GSH          | ABCC1 | rs215100   | 0.762556781  | 0.009689485 | 0.749485946 | 0.038160969 | 0.587275608 | 0.022908831 | 0.009689485 |
| GSH          | ABCC1 | rs215101   | 0.806668468  | 0.152279924 | 0.821643948 | 0.230677801 | 0.443726154 | 0.193662174 | 0.152279924 |
| GSH          | GSTO1 | rs2164624  | 1.2711425396 | 0.021765871 | 1.382948581 | 0.020552881 | 1.315273583 | 0.222051482 | 0.020552881 |
| GSH          | GSTA2 | rs2180314  | 1.016370389  | 0.866810051 | 1.075717023 | 0.614220143 | 0.948165104 | 0.755843525 | 0.614220143 |
| GSH          | ABCC4 | rs2182262  | 1.074905582  | 0.596534718 | 1.06356188  | 0.698763687 | 1.292980759 | 0.541558805 | 0.541558805 |
| Inflammation | PTGS2 | rs2206593  | 0.924475489  | 0.680900465 | 0.849863972 | 0.448592479 | 2.147442615 | 0.329910989 | 0.329910989 |
| Inflammation | IL8   | rs2227306  | 0.995316961  | 0.962897239 | 0.93027406  | 0.639066145 | 1.082873343 | 0.650167083 | 0.639066145 |
| Inflammation | IL8   | rs2227543  | 1.008783661  | 0.930260879 | 0.946041149 | 0.715955745 | 1.104020228 | 0.56978676  | 0.56978676  |
| DNA          | XPC   | rs2228000  | 1.240545559  | 0.055170131 | 1.228100335 | 0.139671159 | 1.660176699 | 0.072244049 | 0.055170131 |
| GSH          | GSTM3 | rs2234696  | 1.30577119   | 0.142649344 | 1.318874747 | 0.150503318 | 1.644624906 | 0.588454704 | 0.142649344 |
| GSH          | GSS   | rs2236270  | 1.097933398  | 0.358154004 | 1.095502392 | 0.530727391 | 1.190809468 | 0.363251951 | 0.358154004 |
| DNA          | RAD50 | rs2237060  | 1.031576865  | 0.762727362 | 1.176717765 | 0.270329567 | 0.84395319  | 0.380466911 | 0.270329567 |
| GSH          | ABCC1 | rs2239330  | 1.101626034  | 0.385771799 | 0.994920885 | 0.970766894 | 1.797954127 | 0.030706944 | 0.385771799 |
| DNA          | LIG1  | rs2241721  | 0.935043884  | 0.505015383 | 0.971198019 | 0.836983256 | 0.816003256 | 0.306632624 | 0.306632624 |
| DNA          | RAD50 | rs2245176  | 1.050718362  | 0.676541336 | 1.155645272 | 0.311737254 | 0.689897228 | 0.254734322 | 0.254734322 |
| GSH          | GSR   | rs22909345 | 0.929090345  | 0.532988887 | 0.961167881 | 0.780708205 | 0.705440316 | 0.289798359 | 0.289798359 |
| DNA          | RRM1  | rs2268166  | 0.845683317  | 0.461581903 | 0.775264914 | 0.294072638 | 7.868980798 | 0.201931162 | 0.201931162 |
| GSH          | GCLC  | rs2268327  | 1.260039852  | 0.507784949 | 1.27789624  | 0.489513425 | NA          | NA          | 0.489513425 |
| DNA          | OGG1  | rs2269112  | 0.931686372  | 0.594819786 | 0.887326393 | 0.429848945 | 1.253407622 | 0.598971058 | 0.429848945 |
| GSH          | GSTZ1 | rs2270422  | 1.078442857  | 0.457796385 | 1.071815415 | 0.633842771 | 1.160032093 | 0.439086269 | 0.439086269 |
| GSH          | GSS   | rs2273684  | 1.090225261  | 0.383055064 | 1.15836827  | 0.343082581 | 1.079051092 | 0.651188077 | 0.343082581 |
| GSH          | ABCC4 | rs2274403  | 1.135291143  | 0.197443222 | 1.075810294 | 0.635319136 | 1.32626003  | 0.092593322 | 0.092593322 |
| GSH          | ABCC4 | rs2274405  | 0.948939738  | 0.634649756 | 1.035410835 | 0.807162574 | 0.691064161 | 0.1400809   | 0.1400809   |
| GSH          | GSTA4 | rs2274760  | 1.30259463   | 0.080354021 | 1.447356009 | 0.028084077 | 0.613589141 | 0.399894966 | 0.028084077 |
| DNA          | PARP  | rs2275660  | 1.000197882  | 0.998641723 | 0.941317237 | 0.670528709 | 1.32508399  | 0.358561223 | 0.358561223 |
| GSH          | ABCC3 | rs2277624  | 1.064013848  | 0.602873725 | 1.129804668 | 0.387851134 | 0.822521229 | 0.560273027 | 0.387851134 |
| DNA          | PARP  | rs2282410  | 0.951953072  | 0.630423362 | 0.993049189 | 0.967930929 | 0.63327381  | 0.373992737 | 0.373992737 |
| DNA          | RRM1  | rs2284449  | 0.708711116  | 0.356303051 | 0.708711116 | 0.356303051 | NA          | NA          | 0.356303051 |
| GSH          | GSTZ1 | rs2287396  | 1.004067222  | 0.975241994 | 0.978775074 | 0.882688785 | 1.298272322 | 0.566200211 | 0.566200211 |
| GSH          | GSTZ1 | rs2287397  | 0.974866139  | 0.939122294 | 0.974866139 | 0.939122294 | NA          | NA          | 0.939122294 |
| GSH          | ABCC1 | rs2299670  | 0.840880047  | 0.107209593 | 0.774502372 | 0.07064223  | 0.889774028 | 0.610443235 | 0.07064223  |
| GSH          | GCLM  | rs2301022  | 0.88906628   | 0.269140954 | 0.875822656 | 0.341718896 | 0.821580681 | 0.403258075 | 0.269140954 |
| DNA          | MSH2  | rs2303428  | 0.813493481  | 0.185813991 | 0.84952966  | 0.341209689 | 0.313652343 | 0.089603154 | 0.089603154 |
| DNA          | RRM1  | rs232045   | 0.811924128  | 0.320324306 | 0.770730808 | 0.252612306 | 1.281059769 | 0.787907928 | 0.252612306 |
| DNA          | RRM1  | rs232054   | 0.850588897  | 0.102686654 | 0.823459191 | 0.197569323 | 0.785136823 | 0.16631238  | 0.102686654 |
| DNA          | MSH6  | rs2348244  | 0.902821006  | 0.453220257 | 0.902638895 | 0.503734483 | 0.779608046 | 0.594748615 | 0.453220257 |
| DNA          | ERRC2 | rs238415   | 1.006209154  | 0.950021289 | 0.953618164 | 0.742304631 | 1.104757064 | 0.590074657 | 0.590074657 |
| DNA          | LIG1  | rs2386523  | 0.949201931  | 0.589796567 | 0.867010011 | 0.357574867 | 1.0093638   | 0.954256617 | 0.357574867 |
| GSH          | GPX2  | rs2412065  | 0.931928007  | 0.547203089 | 0.934947726 | 0.637605137 | 0.637368012 | 0.569157565 | 0.547203089 |
| GSH          | ABCC3 | rs2412333  | 0.973005254  | 0.810997174 | 1.000629296 | 0.996408687 | 0.832725993 | 0.534370894 | 0.534370894 |
| DNA          | MSH3  | rs245345   | 1.07321632   | 0.453137611 | 1.145470586 | 0.369837722 | 1.050630756 | 0.776714831 | 0.369837722 |
| DNA          | MSH3  | rs245400   | 1.127194214  | 0.36531726  | 1.131380656 | 0.421732885 | 1.306709062 | 0.51005383  | 0.36531726  |
| GSH          | ABCC1 | rs246217   | 0.891358224  | 0.469398793 | 0.885808613 | 0.478971492 | 0.818248715 | 0.771725583 | 0.469398793 |
| GSH          | ABCC1 | rs246221   | 0.963626068  | 0.733794726 | 0.982348458 | 0.898054933 | 0.867969513 | 0.577580452 | 0.577580452 |
| GSH          | ABCC1 | rs246230   | 1.008168936  | 0.954227885 | 1.021867197 | 0.892753501 | 0.904071325 | 0.834159528 | 0.834159528 |
| DNA          | XPC   | rs2470353  | 1.190316572  | 0.077242724 | 1.317162896 | 0.086959456 | 1.207567347 | 0.241204193 | 0.077242724 |
| GSH          | ABCC4 | rs2487566  | 1.087161971  | 0.39908983  | 1.237446026 | 0.178336054 | 0.999239385 | 0.996319008 | 0.178336054 |
| DNA          | MSH3  | rs249633   | 0.939949124  | 0.590099901 | 0.948850968 | 0.708757725 | 0.835090723 | 0.546254802 | 0.546254802 |
| DNA          | XPC   | rs2607734  | 0.912976514  | 0.367326931 | 0.927467696 | 0.59976604  | 0.818812688 | 0.305554457 | 0.305554457 |
| DNA          | RAD51 | rs2619681  | 1.142087705  | 0.311328648 | 1.17965328  | 0.277831258 | 1.102577547 | 0.809131026 | 0.277831258 |
| DNA          | MSH3  | rs26279    | 1.146848967  | 0.212202259 | 1.142023225 | 0.341073564 | 1.362644307 | 0.2355815   | 0.212202259 |
| DNA          | XPC   | rs2733537  | 1.056627634  | 0.596613943 | 1.115713938 | 0.435559722 | 0.978171672 | 0.919021701 | 0.435559722 |
| GSH          | GPX2  | rs2737844  | 0.910894314  | 0.378788139 | 0.897234745 | 0.435189572 | 0.859095459 | 0.522856322 | 0.378788139 |
| Inflammation | PTGS2 | rs2745557  | 0.867949909  | 0.257700751 | 0.79763015  | 0.12801443  | 1.165521888 | 0.66778701  | 0.12801443  |
| GSH          | ABCC2 | rs2756105  | 1.06368406   | 0.536285514 | 1.007956652 | 0.957581027 | 1.205619967 | 0.295979209 | 0.295979209 |
| GSH          | ABCC2 | rs2756109  | 0.795915097  | 0.025453115 | 0.769467733 | 0.081792644 | 0.705201706 | 0.057313151 | 0.025453115 |
| GSH          | ABCC4 | rs2766482  | 1.11526936   | 0.28427068  | 1.119803327 | 0.428930673 | 1.218797765 | 0.320453491 | 0.28427068  |
| GSH          | ABCC2 | rs2804397  | 0.841222475  | 0.449239391 | 0.803850651 | 0.369651341 | 1.591080705 | 0.676567544 | 0.369651341 |
| DNA          | XPA   | rs2805835  | 1.063515737  | 0.70177851  | 1.062624669 | 0.723480539 | 1.190966937 | 0.81279731  | 0.70177851  |
| Inflammation | IL1B  | rs2853550  | 0.99962266   | 0.999844223 | 0.995707557 | 0.983137903 | 1.112171676 | 0.916459022 | 0.916459022 |
| DNA          | XRC1  | rs2854506  | 1.100331942  | 0.407496044 | 1.200223283 | 0.19614343  | 0.834510503 | 0.550049604 | 0.19614343  |
| DNA          | XRC1  | rs2854510  | 1.04919487   | 0.895187824 | 1.030498077 | 0.835247169 | 1.244893013 | 0.534681309 | 0.534681309 |
| DNA          | ABCC1 | rs2889517  | 0.91843219   | 0.418647022 | 0.928280693 | 0.588970093 | 0.813888128 | 0.382253375 | 0.382253375 |
| GSH          | ABCC4 | rs2892713  | 0.914627713  | 0.532174813 | 0.894956592 | 0.484617497 | 1.007242639 | 0.98880559  | 0.484617497 |
| GSH          | ABCC4 | rs2892716  | 1.0038274    | 0.970421007 | 1.005169041 | 0.971090602 | 1.004463608 | 0.982732537 | 0.970421007 |
| DNA          | MSH3  | rs2897298  | 1.208223097  | 0.216944669 | 1.191389255 | 0.293833857 | 1.966467641 | 0.27547271  | 0.216944669 |
| GSH          | GSR   | rs2911670  | 1.069778065  | 0.749025302 | 1.075989955 | 0.730175247 | 2.25E-05    | 0.977427669 | 0.730175247 |
| GSH          | GSR   | rs2978662  | 0.983228892  | 0.897269995 | 1.001663174 | 0.99097774  | 0.810552998 | 0.637563004 | 0.637563004 |
| GSH          | GSR   | rs2978663  | 0.8891387    | 0.256130709 | 0.930145743 | 0.610128436 | 0.723621883 | 0.123829281 | 0.123829281 |
| Inflammation | IL10  | rs3021094  | 1.055812385  |             |             |             |             |             |             |

|              |       |                 |                  |             |             |             |              |              |             |                    |
|--------------|-------|-----------------|------------------|-------------|-------------|-------------|--------------|--------------|-------------|--------------------|
|              | GSH   | GPX3            | rs3792796        | 0.947971172 | 0.601443806 | 0.972492094 | 0.844542914  | 0.857089381  | 0.449041396 | 0.449041396        |
|              | DNA   | MGMT            | rs3793910        | 0.994265886 | 0.969699361 | 0.956458503 | 0.787731813  | 1.638694753  | 0.40758421  | 0.40758421         |
| Inflammation | IL1RN |                 | rs380092         | 1.033110815 | 0.763258089 | 1.061928253 | 0.666064613  | 0.981300376  | 0.938406662 | 0.666064613        |
|              | GSH   | GPX3            | rs3805435        | 1.139076132 | 0.457370252 | 1.138542581 | 0.49914292   | 1.432325146  | 0.61118089  | 0.457370252        |
|              | GSH   | GPX3            | rs3828599        | 1.026821179 | 0.811818318 | 1.039166812 | 0.785046031  | 1.015279171  | 0.955494594 | 0.785046031        |
|              | DNA   | MGMT            | rs3852507        | 0.927849349 | 0.454965194 | 0.969711613 | 0.848363403  | 0.843978835  | 0.30322331  | 0.30322331         |
|              | DNA   | MGMT            | rs3858300        | 1.163513325 | 0.15387418  | 1.079452344 | 0.599269912  | 1.532353426  | 0.040984293 | <b>0.040984293</b> |
|              | GSH   | ABCC1           | rs3887893        | 0.861882066 | 0.145331994 | 0.867903393 | 0.328455512  | 0.750079948  | 0.141848772 | 0.141848772        |
|              | DNA   | ERC2            | <b>rs3918697</b> | 1.282109259 | 0.026265316 | 1.328085711 | 0.041430039  | 1.478322846  | 0.150051885 | <b>0.026265316</b> |
| Inflammation | IL1RN |                 | rs3921211        | 1.061306968 | 0.57781506  | 1.104029052 | 0.47574665   | 1.003771213  | 0.587530396 | 0.47574665         |
|              | GSH   | GSTA4           | rs405729         | 1.06555885  | 0.522041634 | 1.170200649 | 0.310042318  | 0.996601775  | 0.983961272 | 0.310042318        |
|              | GSH   | GSTP1           | rs4147581        | 0.937272983 | 0.514606796 | 0.925299714 | 0.628072004  | 0.910301622  | 0.564463645 | 0.514606796        |
|              | GSH   | ABCC1           | rs4148350        | 0.802481965 | 0.292766972 | 0.819044228 | 0.365743179  | 0.31193364   | 0.330986453 | 0.292766972        |
|              | GSH   | ABCC2           | rs4148398        | 1.077471675 | 0.475877531 | 1.010629826 | 0.940924738  | 1.321047618  | 0.185798164 | 0.185798164        |
|              | GSH   | ABCC3           | rs4148412        | 1.04485399  | 0.669178392 | 1.031490908 | 0.826241423  | 1.119444031  | 0.587603212 | 0.587603212        |
|              | GSH   | ABCC4           | rs4148424        | 0.998244491 | 0.988252306 | 0.948559973 | 0.709653418  | 1.317200024  | 0.406349822 | 0.406349822        |
|              | GSH   | ABCC4           | rs4148434        | 1.071417091 | 0.493102953 | 1.091881648 | 0.530087652  | 1.102688055  | 0.633464675 | 0.493102953        |
|              | GSH   | ABCC4           | rs4148446        | 1.021176478 | 0.832157771 | 1.138612601 | 0.372246638  | 0.873440731  | 0.462515655 | 0.372246638        |
|              | GSH   | ABCC4           | rs4148482        | 0.953472649 | 0.663746765 | 1.032035196 | 0.820439877  | 0.694114705  | 0.156985644 | 0.156985644        |
|              | GSH   | ABCC4           | rs4148512        | 1.122859603 | 0.341661791 | 1.121492483 | 0.422896424  | 1.313766745  | 0.438001514 | 0.341661791        |
|              | GSH   | ABCC4           | rs4148527        | 0.941841714 | 0.638941406 | 0.897889099 | 0.459719045  | 1.271437044  | 0.559447404 | 0.459719045        |
|              | GSH   | ABCC4           | rs4148535        | 0.871037238 | 0.236589101 | 0.783706771 | 0.085520834  | 1.210873892  | 0.535830895 | 0.085520834        |
|              | DNA   | LIG1            | rs416844         | 1.05213162  | 0.605239638 | 0.98778444  | 0.936042591  | 1.178917151  | 0.329239517 | 0.329239517        |
| Inflammation | IL1RN |                 | rs4252041        | 0.613063448 | 0.053377546 | 0.650905006 | 0.112224192  | 7.10E-07     | 0.965249434 | 0.053377546        |
|              | GSH   | ABCC4           | rs4283094        | 0.976031196 | 0.801407021 | 1.056917027 | 0.730250118  | 0.889806508  | 0.456597337 | 0.456597337        |
|              | GSH   | GPX5            | rs440481         | 1.130279506 | 0.345495446 | 1.131624257 | 0.414340119  | 1.337488185  | 0.459220277 | 0.345495446        |
|              | GSH   | GPX5            | rs445870         | 1.120717305 | 0.27503445  | 1.051560611 | 0.1717036956 | 1.506335492  | 0.073805768 | 0.073805768        |
|              | DNA   | MSH2            | rs4608577        | 1.10144988  | 0.466635367 | 1.083394298 | 0.589976719  | 1.469292641  | 0.395049646 | 0.395049646        |
|              | GSH   | ABCC4           | rs4636781        | 0.949516891 | 0.693933018 | 0.997031099 | 0.984477795  | 0.617502403  | 0.248792886 | 0.248792886        |
| Inflammation | PTGS2 |                 | rs4648261        | 1.003834079 | 0.988107858 | 1.007797636 | 0.975989959  | NA           | NA          | 0.975989959        |
| Inflammation | PTGS2 |                 | rs4648307        | 0.957861978 | 0.766222319 | 0.931888154 | 0.667655423  | 1.14183159   | 0.784647393 | 0.667655423        |
|              | GSH   | GCLC            | <b>rs4712035</b> | 1.358921486 | 0.017636406 | 1.341932112 | 0.048099172  | 2.30443161   | 0.041592007 | <b>0.017636406</b> |
|              | GSH   | GPX8            | rs4713167        | 1.117794335 | 0.31105085  | 1.037962312 | 0.788289825  | 1.489802289  | 0.078962775 | 0.078962775        |
|              | GSH   | GSTA5           | rs4715352        | 1.011304799 | 0.924507319 | 1.034012404 | 0.814111895  | 0.913985635  | 0.781989584 | 0.781989584        |
|              | GSH   | GSTA5           | rs4715353        | 0.941979436 | 0.536857326 | 0.861593291 | 0.309828874  | 1.016532236  | 0.925077534 | 0.309828874        |
|              | GSH   | GSTA5           | rs4715354        | 1.064040719 | 0.517375736 | 1.1117472   | 0.492990572  | 1.062031906  | 0.709073807 | 0.492990572        |
|              | DNA   | MGMT            | rs4750761        | 1.056682607 | 0.614811749 | 1.2203984   | 0.152411154  | 0.685729984  | 0.145975617 | 0.145975617        |
|              | DNA   | MGMT            | rs4750764        | 0.961152266 | 0.681408363 | 0.965538482 | 0.815654908  | 0.926186844  | 0.648951919 | 0.648951919        |
|              | DNA   | MGMT            | rs4750765        | 1.012986726 | 0.899137948 | 0.945728029 | 0.688999413  | 1.204813727  | 0.381194634 | 0.381194634        |
|              | DNA   | MGMT            | rs4750768        | 0.949734279 | 0.618530563 | 0.969502089 | 0.824614147  | 0.855496225  | 0.479168674 | 0.479168674        |
|              | DNA   | MGMT            | rs4751107        | 1.063472664 | 0.581983891 | 1.124865399 | 0.396378157  | 0.91508529   | 0.745111793 | 0.396378157        |
|              | GSH   | ABCC4           | rs4773844        | 0.998336191 | 0.989169078 | 0.915600244 | 0.539636035  | 1.704621097  | 0.138566206 | 0.138566206        |
|              | GSH   | ABCC4           | rs4773856        | 1.005141063 | 0.963086308 | 0.939898884 | 0.659035728  | 1.294297106  | 0.3378509   | 0.3378509          |
|              | GSH   | ABCC4           | rs4773867        | 0.736622865 | 0.040171114 | 0.734286898 | 0.063232166  | 0.464385085  | 0.164771549 | <b>0.040171114</b> |
|              | GSH   | ABCC1           | rs4780589        | 0.955230023 | 0.666030423 | 0.970740515 | 0.830534367  | 0.866247888  | 0.547710964 | 0.547710964        |
|              | GSH   | ABCC1           | rs4781701        | 0.995680369 | 0.972187408 | 0.908994694 | 0.515049228  | 1.775004444  | 0.123504858 | 0.123504858        |
|              | GSH   | ABCC3           | rs4794173        | 0.999658878 | 0.997582857 | 1.002958942 | 0.983057779  | 0.986170776  | 0.960125159 | 0.960125159        |
|              | DNA   | MSH2            | rs4952887        | 0.94105507  | 0.73016813  | 0.952996769 | 0.796261581  | 0.634717762  | 0.618232669 | 0.618232669        |
|              | DNA   | ERC2            | rs50871          | 1.153574754 | 0.151516723 | 1.312921459 | 0.085736907  | 1.101754439  | 0.559195045 | 0.085736907        |
|              | DNA   | ERC2            | rs50872          | 0.953217489 | 0.677648666 | 0.993486175 | 0.96284691   | 0.743858558  | 0.328550555 | 0.328550555        |
|              | GSH   | GCLC            | rs510088         | 1.054465514 | 0.617917739 | 0.996247708 | 0.97839987   | 1.318225958  | 0.245415468 | 0.245415468        |
|              | DNA   | MGMT            | rs511361         | 0.984578965 | 0.878507734 | 1.006280713 | 0.967402604  | 0.945731793  | 0.753400914 | 0.753400914        |
|              | GSH   | GSTA3           | rs512795         | 0.912330809 | 0.627846702 | 0.947043001 | 0.784620556  | 0.272171455  | 0.262965315 | 0.262965315        |
| Inflammation | PTGS2 |                 | rs5275           | 1.000917412 | 0.99298807  | 1.017416115 | 0.902125611  | 0.963053107  | 0.863004133 | 0.863004133        |
| Inflammation | PTGS2 |                 | rs5277           | 1.039557079 | 0.766267293 | 1.006017334 | 0.988119418  | 1.40776924   | 0.409201281 | 0.409201281        |
|              | GSH   | GCLC            | <b>rs4429114</b> | 0.783623007 | 0.016837505 | 0.754491926 | 0.052662572  | 0.680643346  | 0.049409086 | <b>0.016837505</b> |
|              | GSH   | GSTA1           | rs557135         | 0.891831053 | 0.257565006 | 0.952719345 | 0.729976234  | 0.69021582   | 0.07367528  | 0.07367528         |
|              | GSH   | GSTM1           | rs560018         | 0.958620896 | 0.667698935 | 0.806446481 | 1.129885909  | 1.257892836  | 0.228525492 | 0.129885909        |
|              | GSH   | GSTO2           | rs568526         | 1.203695085 | 0.068224944 | 1.317324886 | 0.049883171  | 1.192861777  | 0.40046503  | <b>0.049883171</b> |
|              | DNA   | MGMT            | rs569235         | 0.989480236 | 0.917428621 | 1.132446867 | 0.444000773  | 0.851744456  | 0.338160146 | 0.338160146        |
|              | GSH   | GCLC            | rs574389         | 0.844438349 | 0.089288618 | 0.79437905  | 0.134598097  | 0.805606065  | 0.206570242 | 0.089288618        |
|              | GSH   | GCLC            | rs600033         | 0.83064353  | 0.062801488 | 0.781959925 | 0.109829655  | 0.78269517   | 0.153956529 | 0.062801488        |
|              | GSH   | GSS             | rs6060127        | 1.146439934 | 0.179659348 | 1.257988286 | 0.101517382  | 1.067280936  | 0.756041574 | 0.101517382        |
|              | GSH   | GCLC            | rs606548         | 0.843184128 | 0.441353096 | 0.901900762 | 0.670682865  | 0.203532697  | 0.155907409 | 0.155907409        |
|              | GSH   | GSS             | <b>rs6088659</b> | 0.770218714 | 0.057948216 | 0.826404356 | 0.215519808  | 0.2303308656 | 0.010623423 | <b>0.010623423</b> |
|              | GSH   | GSTA3           | rs614765         | 0.857678847 | 0.595617465 | 0.859210579 | 0.600871863  | NA           | NA          | 0.595617465        |
|              | DNA   | MSH3            | rs6151627        | 0.854649354 | 0.157335626 | 0.7970064   | 0.104049941  | 0.925812347  | 0.771261057 | 0.104049941        |
|              | DNA   | MSH3            | rs6151665        | 0.995339662 | 0.977566876 | 1.043781975 | 0.813059633  | 0.492919545  | 0.326130709 | 0.326130709        |
|              | DNA   | MSH3            | rs6151735        | 1.145669207 | 0.453721894 | 1.176523851 | 0.388920078  | 0.532459031  | 0.61389645  | 0.388920078        |
|              | GSH   | GSTO1           | rs628480         | 0.890902298 | 0.714614603 | 0.840757178 | 0.597719897  | NA           | NA          | 0.597719897        |
|              | DNA   | RAD52           | rs6413436        | 0.886183242 | 0.240022133 | 0.89464553  | 0.443499371  | 0.78789737   | 0.226634297 | 0.226634297        |
|              | GSH   | GCLC            | rs642429         | 0.9349185   | 0.601998284 | 0.949113342 | 0.737962514  | 0.778209736  | 0.491211783 | 0.491211783        |
|              | GSH   | ABCC4           | rs6492763        | 0.952933881 | 0.641526753 | 1.103842162 | 0.491211812  | 0.674947733  | 0.058292877 | 0.058292877        |
|              | GSH   | ABCC4           | rs6492768        | 1.060167522 | 0.611685656 | 1.029238592 | 0.837370936  | 1.2994886    | 0.378916972 | 0.378916972        |
|              | GSH   | GSTM4           | rs650985         | 0.921615375 | 0.68994344  | 0.968087719 | 0.878491432  | 1.35E-06     | 0.966981484 | 0.68994344         |
|              | GSH   | GSTA4           | rs654144         | 1.063424656 | 0.728499917 | 1.058478951 | 0.762031178  | 1.30886093   | 0.761142573 | 0.728499917        |
|              | GSH   | GSTA2           | rs6577           | 1.116756505 | 0.609546189 | 1.169024686 | 0.493116558  | 0.414017539  | 0.472068721 | 0.472068721        |
|              | GSH   | GCLC            | rs670548         | 0.873390426 | 0.181475508 | 0.722991036 | 0.022870677  | 1.116640249  | 0.578417124 | <b>0.022870677</b> |
| Inflammation | PTGS2 | <b>rs689470</b> | 1.955537048      | 1.955537048 | 0.084065512 | 1.955537048 | 0.084065512  | NA           | NA          | 0.084065512        |
|              | GSH   | GSTA4           | rs6904769        | 0.953128977 | 0.762396891 | 1.0596959   | 0.739329751  | 0.184101753  | 0.032668824 | <b>0.032668824</b> |
|              | GSH   | GSTA4           | rs6904771        | 0.989583132 | 0.789236041 | 0.821110163 | 0.855256611  | NA           | NA          | 0.855256611        |
|              | DNA   | MGMT            | rs7068301        | 1.002430083 | 0.980556381 | 1.08875637  | 0.554127732  | 0.868177964  | 0.460225736 | 0.460225736        |
|              | DNA   | MGMT            | rs7073225        | 0.952993922 | 0.677560082 | 1.009037501 | 0.949717373  | 0.690610011  | 0.22668282  | 0.22668282         |
|              | DNA   | MGMT            | rs7080419        | 1.003801513 | 0.969697372 | 1.181604542 | 0.26468599   | 0.795810369  | 0.204606793 | 0.204606793        |
|              | DNA   | MGMT            | rs7087131        | 0.946595805 | 0.866835609 | 0.983471189 |              |              |             |                    |

|     |       |           |             |             |             |             |             |             |                    |
|-----|-------|-----------|-------------|-------------|-------------|-------------|-------------|-------------|--------------------|
| DNA | MGMT  | rs913119  | 1.052129508 | 0.607053315 | 0.948533116 | 0.734061731 | 1.228114527 | 0.217996467 | 0.217996467        |
| GSH | GSTM5 | rs929166  | 0.991115213 | 0.932601423 | 0.885077376 | 0.380325976 | 1.355994487 | 0.196258811 | 0.196258811        |
| GSH | ABCC4 | rs943288  | 0.873712352 | 0.348994378 | 0.888274266 | 0.460179021 | 0.590622653 | 0.325908422 | 0.325908422        |
| GSH | GSTA3 | rs9474339 | 0.968654243 | 0.930178758 | 0.968654243 | 0.930178758 | NA          | NA          | 0.930178758        |
| DNA | PARP  | rs9507355 | 1.004420573 | 0.963934826 | 1.144862659 | 0.377868717 | 0.862172221 | 0.37622694  | 0.37622694         |
| DNA | PARP  | rs9511308 | 1.016015962 | 0.891455712 | 1.06011845  | 0.677465707 | 0.840569966 | 0.578117004 | 0.578117004        |
| GSH | ABCC4 | rs9516530 | 0.868475913 | 0.202918485 | 0.867090537 | 0.305091502 | 0.745303621 | 0.272086104 | 0.202918485        |
| GSH | ABCC4 | rs9516546 | 1.003890314 | 0.971084098 | 0.989119437 | 0.937330885 | 1.053621288 | 0.827881937 | 0.827881937        |
| GSH | ABCC4 | rs9524821 | 1.050472951 | 0.63013507  | 1.186287559 | 0.244380448 | 0.887335336 | 0.534078043 | 0.244380448        |
| GSH | ABCC4 | rs9524822 | 1.23489351  | 0.103530003 | 1.341056892 | 0.048061778 | 0.882597723 | 0.761072442 | <b>0.048061778</b> |
| GSH | ABCC4 | rs9524858 | 1.016385312 | 0.873251473 | 1.044453441 | 0.759368313 | 0.975944598 | 0.904464974 | 0.759368313        |
| GSH | ABCC4 | rs9524885 | 1.088579537 | 0.731170433 | 1.105507995 | 0.690423327 | 9.22E-06    | 0.978935858 | 0.690423327        |
| GSH | ABCC4 | rs9561784 | 1.043267231 | 0.713417788 | 1.072892029 | 0.615313593 | 0.963442441 | 0.902190372 | 0.615313593        |
| GSH | ABCC4 | rs9561797 | 1.121391011 | 0.28154246  | 1.118232421 | 0.421553514 | 1.27562465  | 0.303996026 | 0.28154246         |
| DNA | PARP  | rs9578747 | 0.963801038 | 0.813294799 | 0.924411695 | 0.641533519 | 1.721794322 | 0.412137851 | 0.412137851        |
| DNA | PARP  | rs9581094 | 1.04175972  | 0.765045662 | 1.040503056 | 0.791014009 | 1.119848692 | 0.828450694 | 0.765045662        |
| GSH | ABCC4 | rs9590216 | 1.010536204 | 0.937765607 | 0.931570054 | 0.640471133 | 2.092898802 | 0.101893742 | 0.101893742        |
| DNA | RAD52 | rs9634161 | 1.055163187 | 0.677831338 | 1.056327246 | 0.714742992 | 1.127596162 | 0.760184432 | 0.677831338        |
| GSH | ABCC4 | rs9634642 | 0.983893735 | 0.867210478 | 1.016745289 | 0.91293349  | 0.933617143 | 0.682318641 | 0.682318641        |
| GSH | GPX6  | rs974334  | 1.074807844 | 0.571318597 | 1.079074431 | 0.610128744 | 1.159898567 | 0.69624709  | 0.571318597        |
| DNA | MLH1  | rs9852378 | 1.091122666 | 0.374091654 | 0.944415038 | 0.700089534 | 1.429685465 | 0.041695542 | <b>0.041695542</b> |
