# Supplementary material
Source: PubMed Central journal article supplement (PMC3414259)
Supplement: NIHMS336738-supplement-3.pdf [file NIHMS336738-supplement-3.pdf]

Supplementary Table E3. SNP-Based Analyses for COPD Patients without Lung Cancer and Healthy Control Dataset

| Pathway      | Gene  | RS ID      | OR(Additive Model) | P(Additive Model) | OR(Dominant Model) | P(Dominant Model) | OR(Recessive Model) | P(Recessive Model) | Minimum P Value in Three Genetic Models |
|--------------|-------|------------|--------------------|-------------------|--------------------|-------------------|---------------------|--------------------|-----------------------------------------|
| DNA          | XRCC1 | rs1001581  | 1.112705078        | 0.389638362       | 0.984203964        | 0.930509777       | 1.453254211         | 0.089741688        | 0.089741688                             |
| GSH          | GSTM4 | rs1010167  | 1.174370075        | 0.185412153       | 1.226258959        | 0.261594845       | 1.265899006         | 0.29034588         | 0.185412153                             |
| Inflammation | LTA   | rs1041981  | 0.889512266        | 0.386511294       | 0.868915865        | 0.427769046       | 0.848085524         | 0.571603005        | 0.386511294                             |
| GSH          | GSTZ1 | rs1046428  | 0.889307708        | 0.464086222       | 0.830013501        | 0.319061095       | 1.35401178          | 0.570267187        | 0.319061095                             |
| GSH          | GP1   | rs1047635  | 0.77494757         | 0.042591589       | 0.677890106        | 0.037954535       | 0.7672720485        | 0.33176849         | 0.037954535                             |
| DNA          | APEX1 | rs1048945  | 1.389966611        | 0.225970066       | 1.407857061        | 0.213889048       | 1.19E-05            | 0.385495597        | 0.213889048                             |
| GSH          | GSTO2 | rs10491045 | 0.601338743        | 0.097255982       | 0.601338743        | 0.097255982       | NA                  | NA                 | 0.097255982                             |
| GSH          | ABCC4 | rs10508017 | 0.992896488        | 0.954026367       | 0.91501282         | 0.646010485       | 1.084738837         | 0.693716189        | 0.646010485                             |
| GSH          | ABCC4 | rs10508023 | 0.792117133        | 0.265835409       | 0.768318256        | 0.247542209       | 0.824875174         | 0.815835315        | 0.247542209                             |
| GSH          | ABCC3 | rs1051640  | 0.878571913        | 0.435411027       | 0.854318521        | 0.401011505       | 0.931579899         | 0.894907305        | 0.401011505                             |
| DNA          | RAD52 | rs1051669  | 1.01526097         | 0.916131083       | 1.092998405        | 0.617327307       | 0.741390676         | 0.447467749        | 0.447467749                             |
| DNA          | MGMT  | rs10741191 | 1.237364434        | 0.098054135       | 1.368976916        | 0.098439489       | 1.244285989         | 0.349942156        | 0.098054135                             |
| DNA          | MGMT  | rs10741198 | 0.86617535         | 0.352628541       | 0.897169683        | 0.533928057       | 0.753899426         | 0.322287192        | 0.322287192                             |
| DNA          | RAD52 | rs10744729 | 1.055047229        | 0.658680757       | 1.099234698        | 0.617382432       | 1.045116284         | 0.835014322        | 0.617382432                             |
| DNA          | MGMT  | rs10764901 | 1.151593131        | 0.32202035        | 1.228276667        | 0.237956892       | 1.015378889         | 0.967367424        | 0.237956892                             |
| GSH          | GSTA1 | rs10948723 | 0.889476173        | 0.357115835       | 0.94738758         | 0.772150658       | 0.730691982         | 0.191812432        | 0.191812432                             |
| DNA          | MGMT  | rs11016879 | 0.851757121        | 0.207733068       | 0.711261235        | 0.054832737       | 1.043368828         | 0.980825636        | 0.054832737                             |
| DNA          | MGMT  | rs11016884 | 1.033371068        | 0.803195543       | 1.091887131        | 0.613002067       | 0.912502919         | 0.761251094        | 0.613002067                             |
| DNA          | MGMT  | rs11016887 | 0.936227126        | 0.690431682       | 0.87883762         | 0.504068238       | 1.288027284         | 0.594989178        | 0.504068238                             |
| DNA          | RAD52 | rs11064607 | 0.936375521        | 0.60450544        | 0.919210884        | 0.652217247       | 0.915510446         | 0.700803854        | 0.60450544                              |
| GSH          | ABCC1 | rs11075295 | 0.902754232        | 0.548701368       | 0.90484099         | 0.603377706       | 0.758827133         | 0.639334815        | 0.548701368                             |
| GSH          | ABCC2 | rs11190291 | 1.282075841        | 0.105990102       | 1.339632948        | 0.102329085       | 1.329241521         | 0.536083449        | 0.102329085                             |
| GSH          | GSTO1 | rs11191975 | 0.783238653        | 0.258475317       | 0.812438204        | 0.353712172       | 8.31E-07            | 0.977601465        | 0.258475317                             |
| GSH          | GSTO2 | rs11191990 | 0.660883167        | 0.297370311       | 0.561697688        | 0.301293743       | NA                  | NA                 | 0.297370311                             |
| DNA          | XPC   | rs1124303  | 0.907293075        | 0.682563935       | 0.938436869        | 0.795872075       | 1.39E-06            | 0.980057453        | 0.682563935                             |
| GSH          | GSTP1 | rs1138272  | 0.755459126        | 0.220456882       | 0.78540613         | 0.30944594        | 7.04E-07            | 0.978447002        | 0.220456882                             |
| Inflammation | IL1B  | rs1143627  | 1.013655592        | 0.918047338       | 0.982181185        | 0.918768566       | 1.107338481         | 0.707414501        | 0.707414501                             |
| Inflammation | IL1B  | rs1143630  | 1.765570145        | 0.01442338        | 1.72220056         | 0.029701509       | 6.061252761         | 0.050358077        | 0.01442338                              |
| Inflammation | IL1B  | rs1143633  | 1.108336649        | 0.428879118       | 1.07821446         | 0.676580128       | 1.305178921         | 0.310424861        | 0.310424861                             |
| Inflammation | IL1B  | rs1143634  | 0.852339267        | 0.28682088        | 0.851714855        | 0.362412787       | 0.699527318         | 0.413575715        | 0.28682088                              |
| GSH          | GSTO1 | rs1147611  | 1.129146477        | 0.339239992       | 1.212937587        | 0.27375359        | 1.089355159         | 0.74518728         | 0.27375359                              |
| GSH          | GSTO1 | rs11509438 | 1.15595474         | 0.682865257       | 1.15595474         | 0.682865257       | NA                  | NA                 | 0.682865257                             |
| DNA          | MGMT  | rs11511217 | 1.037904152        | 0.791542648       | 1.098801246        | 0.591102814       | 0.85980917          | 0.676751547        | 0.591102814                             |
| GSH          | ABCC4 | rs11568643 | 1.009692231        | 0.966514103       | 1.051956195        | 0.831736708       | 2.26E-06            | 0.975776187        | 0.831736708                             |
| GSH          | ABCC4 | rs11568658 | 0.740699451        | 0.429930675       | 0.770787155        | 0.514393167       | 1.29E-06            | 0.982651169        | 0.429930675                             |
| GSH          | ABCC4 | rs11568663 | 0.926791204        | 0.694188704       | 0.854721729        | 0.46323219        | 1.969489262         | 0.294600338        | 0.294600338                             |
| DNA          | MGMT  | rs11592158 | 0.928591979        | 0.623036821       | 0.921382992        | 0.649187075       | 0.878429661         | 0.757518265        | 0.623036821                             |
| GSH          | ABCC2 | rs11597282 | 0.993150476        | 0.9843731         | 0.993150476        | 0.9843731         | NA                  | NA                 | 0.9843731                               |
| DNA          | ERCC1 | rs11615    | 1.214618964        | 0.127804826       | 1.141762046        | 0.467463599       | 1.598722113         | 0.048500282        | 0.048500282                             |
| GSH          | GSTM5 | rs117807   | 1.010905936        | 0.942828988       | 0.924737023        | 0.666192479       | 1.008460096         | 0.225690536        | 0.225690536                             |
| DNA          | MGMT  | rs11813066 | 0.815131595        | 0.268789059       | 0.768581652        | 0.202121006       | 1.04329178          | 0.943864093        | 0.202121006                             |
| DNA          | MGMT  | rs11813383 | 1.105434407        | 0.582929534       | 1.172563215        | 0.408419074       | 0.575635438         | 0.486086665        | 0.408419074                             |
| DNA          | PARP  | rs11842915 | 1.529287469        | 0.006425592       | 1.564938184        | 0.015224778       | 2.310540769         | 0.053398966        | 0.006425592                             |
| GSH          | ABCC1 | rs11864374 | 0.106800965        | 0.634394314       | 1.055748292        | 0.758165376       | 1.215554115         | 0.566352419        | 0.566352419                             |
| GSH          | ABCC4 | rs1189428  | 0.999372594        | 0.995987385       | 0.913068631        | 0.627519277       | 1.129193847         | 0.576323879        | 0.576323879                             |
| GSH          | ABCC4 | rs1189446  | 1.392030536        | 0.037447286       | 1.425416264        | 0.051369785       | 1.781857195         | 0.237951167        | 0.037447286                             |
| GSH          | ABCC4 | rs1189457  | 1.020650561        | 0.873093135       | 1.077878796        | 0.691385825       | 0.954082951         | 0.840564385        | 0.691385825                             |
| GSH          | ABCC4 | rs1189465  | 0.908159442        | 0.439891102       | 1.064032474        | 0.739586648       | 0.648136839         | 0.072831944        | 0.072831944                             |
| GSH          | ABCC4 | rs1189470  | 1.075499558        | 0.636053979       | 1.009157762        | 0.960507692       | 1.652660912         | 0.217933714        | 0.217933714                             |
| GSH          | GSTA3 | rs11961374 | 1.241354537        | 0.659896963       | 1.241354537        | 0.659896963       | NA                  | NA                 | 0.659896963                             |
| GSH          | GSTA1 | rs11969435 | 0.900692885        | 0.40887775        | 0.95356423         | 0.798774686       | 0.756375639         | 0.239860975        | 0.239860975                             |
| DNA          | MGMT  | rs12219606 | 0.89244416         | 0.362025263       | 0.995464224        | 0.979849498       | 0.651846906         | 0.091454118        | 0.091454118                             |
| DNA          | MGMT  | rs12220782 | 0.81608587         | 0.138185052       | 0.845686255        | 0.335747872       | 0.557167852         | 0.084977144        | 0.084977144                             |
| DNA          | MGMT  | rs12243174 | 0.863920754        | 0.328449552       | 0.822964821        | 0.285886313       | 0.89453011          | 0.775470311        | 0.285886313                             |
| DNA          | MGMT  | rs12256667 | 0.958481034        | 0.848607856       | 0.872129506        | 0.484521326       | 1.854678421         | 1.98721625         | 0.848607856                             |
| GSH          | GSTM4 | rs12405275 | 0.946316232        | 0.860449499       | 0.948752917        | 0.867290618       | NA                  | NA                 | 0.860449499                             |
| DNA          | MGMT  | rs12413023 | 1.060691434        | 0.619957828       | 1.082219471        | 0.670685824       | 1.086190805         | 0.693052266        | 0.619957828                             |
| DNA          | MSH3  | rs12513549 | 1.35265597         | 0.116042752       | 1.196363434        | 0.401123038       | 8.684255971         | 0.002625007        | 0.002625007                             |
| DNA          | MSH3  | rs12522132 | 1.386559554        | 0.067194388       | 1.274491351        | 0.231612819       | 4.486743627         | 0.008542324        | 0.008542324                             |
| GSH          | GCLC  | rs12524494 | 0.61123453         | 0.112203498       | 0.56738764         | 0.093742566       | 0.718511307         | 0.776583643        | 0.093742566                             |
| GSH          | GCLC  | rs12524500 | 0.597856774        | 0.017861284       | 0.597856774        | 0.017861284       | NA                  | NA                 | 0.017861284                             |
| GSH          | GCLC  | rs12525474 | 1.182613592        | 0.353093603       | 1.153354369        | 0.484271177       | 1.916985298         | 0.281025996        | 0.281025996                             |
| GSH          | GSTM5 | rs12743015 | 1.432818013        | 0.332827403       | 1.432818013        | 0.332827403       | NA                  | NA                 | 0.332827403                             |
| DNA          | MGMT  | rs12763287 | 1.201203355        | 0.254159686       | 1.168304025        | 0.414583958       | 1.857417371         | 0.178116704        | 0.178116704                             |
| DNA          | RRM1  | rs12806698 | 1.038314432        | 0.790075897       | 0.984149571        | 0.926859834       | 1.334778587         | 0.392390414        | 0.392390414                             |
| DNA          | RAD52 | rs12827646 | 1.084605523        | 0.629849096       | 1.090166524        | 0.652924254       | 1.170446789         | 0.775315266        | 0.629849096                             |
| DNA          | MGMT  | rs12917    | 0.910756723        | 0.610651793       | 0.915355416        | 0.653004379       | 0.722258403         | 0.696452602        | 0.610651793                             |
| GSH          | ABCC1 | rs12924212 | 0.978820349        | 0.862067957       | 0.856036547        | 0.387407596       | 1.187060301         | 0.443003494        | 0.387407596                             |
| DNA          | MSH2  | rs12998837 | 0.87717476         | 0.485305597       | 0.885642493        | 0.552451674       | 0.615785949         | 0.546856494        | 0.485305597                             |
| DNA          | ERCC2 | rs13181    | 1.005866202        | 0.962875049       | 1.057613764        | 0.753717102       | 0.917898634         | 0.731683713        | 0.731683713                             |
| GSH          | GSTM3 | rs1332018  | 1.172792398        | 0.206703475       | 1.1164211          | 0.56161279        | 1.409439187         | 0.116496685        | 0.116496685                             |
| GSH          | ABCC1 | rs152022   | 1.060159491        | 0.686135526       | 1.135377144        | 0.485637837       | 0.86322617          | 0.701692752        | 0.485637837                             |
| GSH          | ABCC1 | rs152023   | 1.028149348        | 0.829695938       | 1.254960873        | 0.19635248        | 0.616505425         | 0.114515634        | 0.114515634                             |
| GSH          | ABCC1 | rs152028   | 1.152127641        | 0.283684558       | 1.262292848        | 0.184689992       | 1.039621993         | 0.895288203        | 0.283684558                             |
| GSH          | ABCC3 | rs1541392  | 1.13982861         | 0.460548874       | 1.088586494        | 0.670528366       | 2.043829148         | 0.203416806        | 0.203416806                             |
| GSH          | ABCC4 | rs1564351  | 0.935684095        | 0.762033464       | 0.930269498        | 0.753320899       | 0.981050949         | 0.987103943        | 0.753320899                             |
| GSH          | GSTO2 | rs156599   | 1.02702218         | 0.840295665       | 0.992619698        | 0.966173547       | 1.161120021         | 0.602928871        | 0.840295665                             |
| GSH          | GSTO2 | rs157077   | 1.012243436        | 0.920977291       | 1.171473198        | 0.39426328        | 0.820220999         | 0.390502575        | 0.390502575                             |
| GSH          | GSTO2 | rs157080   | 1.033920834        | 0.80038554        | 1.004387495        | 0.97998858        | 1.161120025         | 0.602928871        | 0.602928871                             |
| DNA          | OGG1  | rs159154   | 1.128339566        | 0.338348357       | 1.207894456        |                   |                     |                    |                                         |

|              |       |           |             |             |             |             |             |             |                    |
|--------------|-------|-----------|-------------|-------------|-------------|-------------|-------------|-------------|--------------------|
| GSH          | GSS   | rs2025096 | 1.431334709 | 0.014775936 | 1.484864276 | 0.026832471 | 1.879268358 | 0.10254927  | <b>0.014775936</b> |
| DNA          | MGMT  | rs2026975 | 1.119843524 | 0.399419238 | 1.148650269 | 0.42525831  | 1.173569196 | 0.604918078 | 0.399419238        |
| DNA          | MGMT  | rs2026976 | 1.055091047 | 0.681129828 | 1.023271549 | 0.895690473 | 1.196055411 | 0.50698821  | 0.50698821         |
| GSH          | GPX5  | rs2064424 | 0.928900586 | 0.74467466  | 0.893435042 | 0.647821633 | 1.41854262  | 0.688940125 | 0.647821633        |
| Inflammation | IL6   | rs2066992 | 0.86478569  | 0.623261238 | 0.888121495 | 0.696058165 | 3.14E-06    | 0.977930619 | 0.623261238        |
| Inflammation | IL6   | rs2069835 | 0.854070571 | 0.563481716 | 0.896717914 | 0.701758987 | 1.24E-06    | 0.977456285 | 0.563481716        |
| Inflammation | IL6   | rs2069840 | 1.193192246 | 0.175075222 | 1.344184559 | 0.098814964 | 1.075242861 | 0.789344629 | 0.098814964        |
| Inflammation | IL6   | rs2069843 | 1.430428454 | 0.348503883 | 1.595023142 | 0.23871785  | NA          | NA          | 0.23871785         |
| Inflammation | IL6   | rs2069852 | 1.057446803 | 0.886487358 | 1.057446803 | 0.886487358 | NA          | NA          | 0.886487358        |
| Inflammation | IL6   | rs2069861 | 0.78016182  | 0.180002035 | 0.803264095 | 0.31080196  | 7.58E-07    | 0.371905054 | 0.180002035        |
| DNA          | MSH6  | rs2072447 | 0.908677053 | 0.502480664 | 0.918130263 | 0.627376678 | 0.770857327 | 0.485248504 | 0.485248504        |
| DNA          | OGG1  | rs2072668 | 0.9639467   | 0.808301697 | 0.974765463 | 0.886174192 | 0.857698117 | 0.729512581 | 0.729512581        |
| GSH          | ABCC1 | rs2074085 | 1.061193005 | 0.768432068 | 0.983784396 | 0.942460899 | 2.395837134 | 0.18120483  | 0.18120483         |
| GSH          | GPX6  | rs2078439 | 0.97574437  | 0.911599077 | 0.948077938 | 0.824425332 | 1.41854262  | 0.688940125 | 0.688940125        |
| GSH          | GCLC  | rs2100375 | 0.70111005  | 0.104251149 | 0.737918745 | 0.083757527 | 0.328027273 | 0.01249994  | <b>0.01249994</b>  |
| GSH          | ABCC1 | rs212081  | 1.006441304 | 0.959806893 | 1.038045398 | 0.835707352 | 0.953856212 | 0.86040819  | 0.835707352        |
| GSH          | ABCC1 | rs212082  | 1.149754572 | 0.378076443 | 1.140730363 | 0.47132185  | 1.456008911 | 0.42645785  | 0.378076443        |
| GSH          | ABCC1 | rs212087  | 0.880436952 | 0.330151455 | 0.806753108 | 0.237500252 | 0.936754144 | 0.791881584 | 0.237500252        |
| GSH          | ABCC1 | rs215100  | 0.927378526 | 0.561155942 | 1.021967217 | 0.900639759 | 0.650794033 | 0.152116212 | 0.152116212        |
| GSH          | ABCC1 | rs215101  | 1.020838074 | 0.908670395 | 1.028429128 | 0.887683231 | 0.966767216 | 0.960408365 | 0.887683231        |
| GSH          | GSTO1 | rs2164624 | 1.094854542 | 0.534089617 | 1.051078213 | 0.778279808 | 1.285349435 | 0.369109266 | 0.369109266        |
| GSH          | ABCA2 | rs2181314 | 0.879675218 | 0.300176891 | 0.906152467 | 0.583474097 | 0.740338152 | 0.214033662 | 0.214033662        |
| GSH          | ABCC4 | rs2182262 | 1.069820697 | 0.697805702 | 1.108770183 | 0.605610245 | 0.889087577 | 0.841538951 | 0.605610245        |
| Inflammation | PTGS2 | rs2206593 | 1.190727946 | 0.435565157 | 1.147162263 | 0.579412162 | 2.574963195 | 0.281017472 | 0.281017472        |
| Inflammation | IL8   | rs2227306 | 1.056290653 | 0.66228746  | 0.9168914   | 0.650226956 | 1.310334644 | 0.202404573 | 0.202404573        |
| Inflammation | IL8   | rs2227543 | 1.061091521 | 0.631667482 | 0.956067249 | 0.81188736  | 1.263113418 | 0.267296036 | 0.267296036        |
| DNA          | XPC   | rs2228000 | 1.003413249 | 0.981431238 | 1.065564886 | 0.716402445 | 0.726017521 | 0.449164746 | 0.449164746        |
| GSH          | GSTM3 | rs2234696 | 1.201024767 | 0.410184152 | 1.129215844 | 0.617263174 | 3.763348707 | 0.122010088 | 0.122010088        |
| GSH          | GSS   | rs2236270 | 1.318992279 | 0.028511866 | 1.498801974 | 0.031629457 | 1.351764411 | 0.190439038 | <b>0.028511866</b> |
| DNA          | RAD50 | rs2237060 | 1.036586681 | 0.769125464 | 0.900105273 | 0.558824539 | 1.324467285 | 0.201077353 | 0.201077353        |
| GSH          | ABCC1 | rs2239330 | 0.91197565  | 0.524643885 | 0.853579461 | 0.365130813 | 1.103241305 | 0.782683655 | 0.365130813        |
| DNA          | LIG1  | rs2241721 | 0.97688883  | 0.848621013 | 0.937411098 | 0.716122574 | 1.026439489 | 0.910767922 | 0.716122574        |
| DNA          | RAD50 | rs2245176 | 0.93528525  | 0.851584025 | 0.95857175  | 0.806233012 | 0.769921321 | 0.510996191 | 0.510996191        |
| GSH          | GSR   | rs2250192 | 1.01299921  | 0.929768533 | 1.046090527 | 0.798995195 | 0.876013751 | 0.42818543  | 0.742818543        |
| DNA          | RRM1  | rs2268166 | 0.505648038 | 0.059659643 | 0.505683577 | 0.059905749 | NA          | NA          | 0.059659643        |
| GSH          | GCLC  | rs2268327 | 1.286372561 | 0.565974701 | 1.318548643 | 0.538115465 | NA          | NA          | 0.538115465        |
| DNA          | OGG1  | rs2269112 | 0.846788229 | 0.341585573 | 0.811233628 | 0.28159203  | 1.023786058 | 0.968208591 | 0.28159203         |
| GSH          | GSTZ1 | rs2270422 | 1.052284423 | 0.688663968 | 1.016437611 | 0.928558949 | 1.164068179 | 0.521125287 | 0.521125287        |
| GSH          | GSS   | rs2273684 | 1.348712621 | 0.014821326 | 1.505761593 | 0.042748243 | 1.48170074  | 0.049336344 | <b>0.014821326</b> |
| GSH          | ABCC4 | rs2274403 | 1.278714109 | 0.049697748 | 1.31016643  | 0.18283174  | 1.462245849 | 0.060012322 | <b>0.049697748</b> |
| GSH          | ABCC4 | rs2274405 | 0.930900978 | 0.60288543  | 0.949410059 | 0.773081012 | 0.814251669 | 0.510323401 | 0.510323401        |
| GSH          | GSTA4 | rs2274760 | 1.07161463  | 0.718125356 | 1.208072814 | 0.377795883 | 0.238371098 | 0.175629817 | 0.175629817        |
| DNA          | PARP  | rs2275660 | 0.87551173  | 0.376505342 | 0.866402162 | 0.42241264  | 0.778934472 | 0.558948049 | 0.376505342        |
| GSH          | ABCC3 | rs2277624 | 0.811498185 | 0.175963715 | 0.795215766 | 0.207698021 | 0.693646098 | 0.410650606 | 0.175963715        |
| DNA          | PARP  | rs2282410 | 1.064761096 | 0.626384565 | 1.191629625 | 0.334912783 | 0.302729511 | 0.690487748 | 0.334912783        |
| DNA          | RRM1  | rs2284449 | 0.749560651 | 0.546278036 | 0.749560651 | 0.546278036 | NA          | NA          | 0.546278036        |
| GSH          | GSTZ1 | rs2287396 | 1.167832393 | 0.322210466 | 1.101778711 | 0.593060836 | 2.054286689 | 0.10504772  | 0.10504772         |
| GSH          | GSTZ1 | rs2287397 | 1.393208061 | 0.379285264 | 1.393208061 | 0.379285264 | NA          | NA          | 0.379285264        |
| GSH          | ABCC1 | rs2299670 | 0.847388296 | 0.213856179 | 0.744910283 | 0.09323822  | 1.004663941 | 0.986452931 | 0.09323822         |
| GSH          | GCLM  | rs2301022 | 0.990243319 | 0.939715364 | 0.938814554 | 0.717285531 | 1.117492471 | 0.681376055 | 0.681376055        |
| DNA          | MSH2  | rs2303428 | 0.929880064 | 0.698448056 | 0.949868383 | 0.808239831 | 0.669278296 | 0.556705789 | 0.556705789        |
| DNA          | RRM1  | rs232045  | 0.678907042 | 0.179764752 | 0.643611647 | 0.154050017 | 0.93422252  | 0.966474492 | 0.154050017        |
| DNA          | RRM1  | rs232054  | 0.852669827 | 0.197354901 | 0.742640134 | 0.107670496 | 0.911947276 | 0.671703667 | 0.107670496        |
| DNA          | MSH6  | rs2348244 | 1.012221978 | 0.943059154 | 1.030294286 | 0.87578061  | 0.870074669 | 0.816685331 | 0.816685331        |
| DNA          | ERCC2 | rs238415  | 0.826454595 | 0.136585955 | 0.815773665 | 0.256662233 | 0.711869455 | 0.1848265   | 0.136585955        |
| DNA          | LIG1  | rs2386253 | 0.992815123 | 0.952109285 | 0.926665241 | 0.697569652 | 1.059005035 | 0.771118294 | 0.697569652        |
| GSH          | GPX2  | rs2412065 | 0.715662303 | 0.034713571 | 0.756557224 | 0.127474833 | 0.257383852 | 0.02831413  | <b>0.02831413</b>  |
| GSH          | ABCC3 | rs2412333 | 1.171262595 | 0.265907552 | 1.268891704 | 0.177743004 | 0.103672527 | 0.969740826 | 0.177743004        |
| DNA          | MSH3  | rs245345  | 0.951921017 | 0.697095782 | 0.920407508 | 0.658581673 | 0.962826869 | 0.867266473 | 0.658581673        |
| DNA          | MSH3  | rs245400  | 1.003781136 | 0.982048346 | 1.003105643 | 0.987163357 | 1.014512782 | 0.978419431 | 0.978419431        |
| GSH          | ABCC1 | rs246217  | 1.226046388 | 0.267046252 | 1.237063713 | 0.290474494 | 1.494796348 | 0.573054055 | 0.267046252        |
| GSH          | ABCC1 | rs246221  | 1.080018388 | 0.55304792  | 0.967474513 | 0.848982019 | 1.554017389 | 0.103933873 | 0.103933873        |
| GSH          | ABCC1 | rs246230  | 1.164571902 | 0.38125314  | 1.208497381 | 0.334590836 | 1.037910489 | 0.951480997 | 0.334590836        |
| DNA          | XPC   | rs2470353 | 1.071404576 | 0.573546691 | 1.09152431  | 0.601466977 | 1.083838406 | 0.69211724  | 0.573546691        |
| GSH          | ABCC4 | rs2487566 | 0.989951212 | 0.933379801 | 0.964448193 | 0.850008129 | 1.012427474 | 0.952028195 | 0.850008129        |
| DNA          | MSH3  | rs249633  | 0.934992835 | 0.643361408 | 0.872366769 | 0.441230105 | 1.167299794 | 0.668231138 | 0.441230105        |
| DNA          | XPC   | rs2607734 | 0.939340086 | 0.618159315 | 0.951751224 | 0.784353594 | 0.867975907 | 0.558462502 | 0.558462502        |
| DNA          | RAD51 | rs2619681 | 1.018407086 | 0.914507044 | 1.053118973 | 0.790338044 | 0.791381427 | 0.687411695 | 0.687411695        |
| DNA          | MSH3  | rs26279   | 1.251164787 | 0.101744108 | 1.291434981 | 0.137173608 | 1.403754542 | 0.275027203 | 0.101744108        |
| DNA          | XPC   | rs2733537 | 0.969846003 | 0.815953244 | 1.050973758 | 0.776384193 | 0.753954266 | 0.340784718 | 0.340784718        |
| GSH          | GPX2  | rs2737844 | 0.8289018   | 0.166712724 | 0.865409613 | 0.406678966 | 0.554055972 | 0.092482011 | 0.092482011        |
| Inflammation | PTGS2 | rs2745557 | 1.004219534 | 0.978381954 | 0.923435106 | 0.669006696 | 1.561756391 | 0.275258715 | 0.275258715        |
| GSH          | ABCC2 | rs2756105 | 1.014157636 | 0.910475436 | 0.878609371 | 0.480993053 | 1.264702522 | 0.286434146 | 0.286434146        |
| GSH          | ABCC2 | rs2756109 | 0.785952221 | 0.057854358 | 0.689932243 | 0.043480805 | 0.797539183 | 0.326506276 | <b>0.043480805</b> |
| GSH          | ABCC4 | rs2766482 | 0.992997563 | 0.956659592 | 1.010920892 | 0.951631673 | 0.950837472 | 0.845538551 | 0.845538551        |
| GSH          | ABCC2 | rs2804397 | 0.889364501 | 0.682384664 | 0.860777525 | 0.623995784 | 1.407774164 | 0.796907169 | 0.623995784        |
| DNA          | XPA   | rs2805835 | 1.147584078 | 0.47663607  | 1.129953055 | 0.561774272 | 1.742636378 | 0.462556707 | 0.462556707        |
| Inflammation | IL1B  | rs2853550 | 1.477990099 | 0.066128186 | 1.385240288 | 0.168279773 | 5.490886461 | 0.023423512 | <b>0.023423512</b> |
| DNA          | XRCC1 | rs2854506 | 0.935664857 | 0.659687812 | 1.003227285 | 0.985741377 | 0.566488555 | 0.222607646 | 0.222607646        |
| DNA          | XRCC1 | rs2854510 | 0.930159103 | 0.643311073 | 0.908204145 | 0.598689391 | 0.980208976 | 0.964815041 | 0.598689391        |
| DNA          | MSH3  | rs289517  | 1.055903814 | 0.881921863 | 1.133892452 | 0.470186533 | 0.915896225 | 0.765054764 | 0.470186533        |
| GSH          | ABCC4 | rs2892713 | 0.703655441 | 0.070406488 | 0.686223561 | 0.073371318 | 0.576239882 | 0.490980362 | 0.070406488        |
| GSH          | ABCC4 | rs2892716 | 1.236870211 | 0.09041291  | 1.158087144 | 0.418991953 | 1.63734737  | 0.030797662 | <b>0.030797662</b> |
| DNA          | MSH3  | rs2897298 | 1.400065229 | 0.059647964 | 1.290239403 | 0.209525285 | 4.478745668 | 0.008578938 | <b>0.008578938</b> |
| GSH          | GSR   | rs2911670 | 0.823496157 | 0.492989506 | 0.777691066 | 0.395447717 | 3.573564048 | 0.393901622 | 0.393901622        |
| GSH          | GSR   | rs2978662 | 0.968457715 | 0.84274681  | 0.88401992  | 0.50704312  | 1.743335095 | 0.23100493  | 0.23100493         |
| GSH          | GSR   | rs2978663 | 1.037284851 | 0.773774935 | 1.062195506 | 0.735489483 | 1.02283237  | 0.928520226 | 0.735489483        |
| Inflammation | IL10  | rs30210   |             |             |             |             |             |             |                    |

|              |       |           |              |             |              |             |             |             |                    |
|--------------|-------|-----------|--------------|-------------|--------------|-------------|-------------|-------------|--------------------|
| GSH          | GPX3  | rs3792796 | 0.991718193  | 0.94822329  | 1.002292406  | 0.989806887 | 0.963878148 | 0.884341331 | 0.884341331        |
| DNA          | MGMT  | rs3793910 | 1.181208226  | 0.360603312 | 1.21476316   | 0.322867321 | 0.98036402  | 0.980620653 | 0.322867321        |
| Inflammation | IL1RN | rs380092  | 1.072317713  | 0.597560291 | 1.058596166  | 0.746043907 | 1.185882018 | 0.541203784 | 0.541203784        |
| GSH          | GPX3  | rs3805435 | 1.527979328  | 0.031111617 | 1.608581676  | 0.032081929 | 1.883258926 | 0.369598346 | <b>0.031111617</b> |
| GSH          | GPX3  | rs3828599 | 1.07760219   | 0.59344805  | 1.160865893  | 0.397538227 | 0.883166557 | 0.727858441 | 0.397538227        |
| DNA          | MGMT  | rs3852507 | 1.024391239  | 0.847042608 | 0.993516632  | 0.974591035 | 1.070832997 | 0.732089242 | 0.732089242        |
| DNA          | MGMT  | rs3858300 | 1.131694183  | 0.347062613 | 0.980562681  | 0.913358848 | 1.637851968 | 0.044057123 | <b>0.044057123</b> |
| GSH          | ABCC1 | rs3887893 | 1.014096056  | 0.910150524 | 0.945050584  | 0.756023517 | 1.145268395 | 0.584046653 | 0.548046653        |
| DNA          | ERCC2 | rs3916874 | 1.40316035   | 0.015151778 | 1.563729461  | 0.010781191 | 1.343603475 | 0.383013463 | <b>0.010781191</b> |
| Inflammation | IL1RN | rs3937211 | 1.101031578  | 0.470042413 | 1.172690941  | 0.36248824  | 1.014760872 | 0.968079983 | 0.36248824         |
| GSH          | GSTA4 | rs4057529 | 1.056678943  | 0.656413102 | 1.218337314  | 0.31365124  | 0.926244105 | 0.722279543 | 0.31365124         |
| GSH          | GSTP1 | rs4147581 | 1.012071089  | 0.921223824 | 0.980926258  | 0.922643349 | 1.052793406 | 0.795098849 | 0.795098849        |
| GSH          | ABCC1 | rs4148350 | 0.855701247  | 0.547047001 | 0.852629001  | 0.567620529 | 0.683689913 | 0.746543836 | 0.547047001        |
| GSH          | ABCC2 | rs4148398 | 1.017403981  | 0.895727292 | 0.933048585  | 0.695913043 | 1.2515746   | 0.389238997 | 0.389238997        |
| GSH          | ABCC3 | rs4148412 | 1.118679863  | 0.381223615 | 1.090328799  | 0.628490044 | 1.298348523 | 0.293072258 | 0.293072258        |
| GSH          | ABCC4 | rs4148424 | 1.172722056  | 0.268287187 | 1.125052654  | 0.502617295 | 1.699903109 | 0.141983521 | 0.141983521        |
| GSH          | ABCC4 | rs4148434 | 1.152295561  | 0.262481942 | 1.233754716  | 0.237460019 | 1.146757088 | 0.589229276 | 0.237460019        |
| GSH          | ABCC4 | rs4148446 | 1.142389485  | 0.271938068 | 1.194161329  | 0.341179206 | 1.200291415 | 0.395660024 | 0.271938068        |
| GSH          | ABCC4 | rs4148482 | 0.873158714  | 0.314976236 | 0.78346136   | 0.161313146 | 1.046214743 | 0.878988786 | 0.161313146        |
| GSH          | ABCC4 | rs4148512 | 0.96884583   | 0.837050654 | 0.943457553  | 0.746229854 | 1.095973039 | 0.835268563 | 0.746229854        |
| GSH          | ABCC4 | rs4148527 | 0.911854519  | 0.574833089 | 0.870384232  | 0.452424512 | 1.279298771 | 0.659489826 | 0.452424512        |
| GSH          | ABCC4 | rs4148535 | 1.099577387  | 0.520905645 | 1.04523794   | 0.809518484 | 1.59119238  | 0.23101172  | 0.23101172         |
| DNA          | LIG1  | rs416844  | 0.993968762  | 0.960926481 | 0.974841458  | 0.892009904 | 1.015583541 | 0.943424571 | 0.892009904        |
| Inflammation | IL1RN | rs4252041 | 0.798024721  | 0.45016228  | 0.854241101  | 0.621299062 | 6.42E-07    | 0.980591236 | 0.45016228         |
| GSH          | ABCC4 | rs4283094 | 0.821840877  | 0.110553592 | 0.870251763  | 0.477686744 | 0.664390333 | 0.056166956 | 0.056166956        |
| GSH          | GPX5  | rs4404481 | 0.960834284  | 0.814095536 | 0.976252542  | 0.901616115 | 0.792383093 | 0.684422949 | 0.684422949        |
| GSH          | GPX5  | rs445870  | 0.901238293  | 0.450000754 | 0.847460323  | 0.342713564 | 0.989677652 | 0.973877472 | 0.342713564        |
| DNA          | MSH2  | rs4608577 | 0.839167133  | 0.305802889 | 0.821788739  | 0.3054032   | 0.794861057 | 0.696532265 | 0.3054032          |
| GSH          | ABCC4 | rs4636781 | 0.829386853  | 0.27645075  | 0.863200971  | 0.453051314 | 0.424729666 | 0.182393127 | 0.182393127        |
| Inflammation | PTGS2 | rs4648261 | 1.088044401  | 0.786846923 | 1.096228108  | 0.770251058 | NA          | NA          | 0.770251058        |
| Inflammation | PTGS2 | rs4648307 | 0.833662229  | 0.337302425 | 0.84208857   | 0.411468625 | 0.537754687 | 0.426069287 | 0.337302425        |
| GSH          | GCLC  | rs4712035 | 1.304419116  | 0.103567398 | 1.375069659  | 0.084065966 | 1.183523793 | 0.76311739  | 0.084065966        |
| GSH          | GPX8  | rs4713167 | 0.882830192  | 0.368373558 | 0.82154984   | 0.259724887 | 0.983690211 | 0.95868671  | 0.259724887        |
| GSH          | GSTA5 | rs4713352 | 0.994981601  | 0.47888654  | 0.964823575  | 0.840182308 | 0.434755114 | 1.130049435 | 1.130049435        |
| GSH          | GSTA5 | rs4715353 | 0.906295211  | 0.436349504 | 0.967439454  | 0.859019287 | 0.754737664 | 0.236084717 | 0.236084717        |
| GSH          | GSTA5 | rs4715354 | 1.08390612   | 0.50921814  | 1.284016644  | 0.212659793 | 0.958786957 | 0.838168985 | 0.212659793        |
| DNA          | MGMT  | rs4750761 | 1.117759143  | 0.391189705 | 1.08439706   | 0.640826965 | 1.361707107 | 0.264279948 | 0.264279948        |
| DNA          | MGMT  | rs4750764 | 1.034532206  | 0.77769757  | 1.207716886  | 0.328232601 | 0.883548587 | 0.55792971  | 0.328232601        |
| DNA          | MGMT  | rs4750765 | 1.060940479  | 0.644152286 | 1.102505643  | 0.579261477 | 1.0316426   | 0.907378106 | 0.579261477        |
| DNA          | MGMT  | rs4750768 | 0.867769889  | 0.283206811 | 0.933938001  | 0.694427987 | 0.591118351 | 0.09502301  | 0.09502301         |
| DNA          | MGMT  | rs4751107 | 1.098329929  | 0.488290402 | 1.014213394  | 0.935794152 | 1.543185657 | 0.143989696 | 0.143989696        |
| GSH          | ABCC4 | rs4773844 | 0.890551527  | 0.468368318 | 0.83250117   | 0.315626858 | 1.24306225  | 0.641151194 | 0.315626858        |
| GSH          | ABCC4 | rs4773856 | 1.079188097  | 0.577786157 | 1.09408603   | 0.606615288 | 1.124938743 | 0.717300159 | 0.577786157        |
| GSH          | ABCC4 | rs4773867 | 1.052092984  | 0.766691141 | 1.125474007  | 0.547598831 | 0.609799104 | 0.448284499 | 0.448284499        |
| GSH          | ABCC1 | rs4780589 | 1.065159093  | 0.625898598 | 1.055720395  | 0.754519172 | 1.16128763  | 0.57980355  | 0.57980355         |
| GSH          | ABCC1 | rs4781701 | 0.938724289  | 0.690120952 | 0.843014567  | 0.352683317 | 1.725531342 | 0.215930244 | 0.215930244        |
| GSH          | ABCC3 | rs4794173 | 1.1476488    | 0.320960825 | 1.145344906  | 0.436233459 | 1.338577946 | 0.371825458 | 0.320960825        |
| DNA          | MSH2  | rs4952887 | 1.106305093  | 0.634988715 | 1.088453008  | 1.712961546 | 1.65465494  | 0.556544076 | 0.556544076        |
| DNA          | ERCC2 | rs50871   | 1.067920678  | 0.593218754 | 1.086323733  | 0.670524266 | 1.097709591 | 0.653687805 | 0.593218754        |
| DNA          | ERCC2 | rs50872   | 0.942599506  | 0.675140895 | 0.901328258  | 0.553968129 | 1.047893621 | 0.891936248 | 0.553968129        |
| GSH          | GCLC  | rs510088  | 1.007610731  | 0.95591626  | 0.977830985  | 0.897389251 | 1.121096413 | 0.714699835 | 0.714699835        |
| DNA          | MGMT  | rs511361  | 0.951936627  | 0.695693296 | 0.869278043  | 0.45554434  | 1.040836359 | 0.855763191 | 0.45554434         |
| GSH          | GSTA3 | rs512795  | 0.611100785  | 0.071545836 | 0.623343806  | 0.094115106 | 1.62E-06    | 0.974262555 | 0.071545836        |
| Inflammation | PTGS2 | rs5275    | 0.886879203  | 0.359644308 | 0.838048665  | 0.314892929 | 0.905510596 | 0.714796509 | 0.314892929        |
| Inflammation | PTGS2 | rs5277    | 0.862188575  | 0.391962663 | 0.863026367  | 0.440071249 | 0.683010505 | 0.568819287 | 0.391962663        |
| GSH          | GCLC  | rs542914  | 0.800830243  | 0.077004493 | 0.730718873  | 0.080116353 | 0.772426558 | 0.281587525 | 0.077004493        |
| GSH          | GSTA3 | rs557135  | 0.897129446  | 0.382933019 | 0.913453876  | 0.60623234  | 0.770983883 | 0.326307608 | 0.326307608        |
| GSH          | GSTM4 | rs560018  | 0.790059926  | 0.073874236 | 0.829738978  | 0.290326087 | 0.547280205 | 0.041286363 | <b>0.041286363</b> |
| GSH          | GSTO2 | rs568526  | 1.118980972  | 0.382536666 | 1.189476383  | 0.323720167 | 1.086420827 | 0.761744312 | 0.323720167        |
| DNA          | MGMT  | rs569235  | 1.015687396  | 0.899352524 | 0.894085679  | 0.567714496 | 1.173129807 | 0.425445993 | 0.425445993        |
| GSH          | GCLC  | rs574389  | 0.753340769  | 0.025070099 | 0.728313703  | 0.090295142 | 0.632044166 | 0.048314208 | <b>0.025070099</b> |
| GSH          | GCLC  | rs600033  | 0.738160262  | 0.016816189 | 0.716151774  | 0.074958386 | 0.605729252 | 0.032762785 | <b>0.016816189</b> |
| GSH          | GSS   | rs6060127 | 0.766879239  | 0.045631788 | 0.776204683  | 0.146672195 | 0.531798656 | 0.046224843 | <b>0.045631788</b> |
| GSH          | GCLC  | rs606548  | 0.51395342   | 0.052015542 | 0.526116947  | 0.078678814 | 8.37E-07    | 0.974601195 | 0.052015542        |
| GSH          | GSS   | rs6088659 | 0.873679363  | 0.418243511 | 0.92990052   | 0.702193351 | 0.392663205 | 0.146688501 | 0.146688501        |
| GSH          | GSTA3 | rs614765  | 0.534897726  | 0.1419794   | 0.53507513   | 0.142917751 | NA          | NA          | 0.1419794          |
| DNA          | MSH3  | rs6151627 | 1.065717934  | 0.634289988 | 0.965118731  | 0.83858026  | 1.506274065 | 0.153781964 | 0.153781964        |
| DNA          | MSH3  | rs6151628 | 0.814974819  | 0.359570373 | 0.871500177  | 0.562938985 | 7.98E-07    | 0.973226228 | 0.359570373        |
| DNA          | MSH3  | rs6151735 | 1.233425151  | 0.33803086  | 1.202402104  | 0.431852881 | 2.847396069 | 0.28758695  | 0.28758695         |
| GSH          | GSTO1 | rs628480  | 0.55918641   | 0.249172305 | 0.55918641   | 0.249172305 | NA          | NA          | 0.249172305        |
| DNA          | RAD52 | rs6413436 | 0.927479711  | 0.550689464 | 0.890382497  | 0.518969991 | 0.934399084 | 0.777456479 | 0.518969991        |
| GSH          | GCLC  | rs642429  | 0.871584635  | 0.417449196 | 0.876454307  | 0.511973293 | 0.674442787 | 0.447847814 | 0.417449196        |
| GSH          | ABCC4 | rs6492763 | 0.903823992  | 0.435160014 | 1.038849225  | 0.830619526 | 0.588814662 | 0.063125355 | 0.063125355        |
| GSH          | ABCC4 | rs6492768 | 1.135943225  | 0.379916106 | 1.254173295  | 0.194853051 | 0.789805085 | 0.572702496 | 0.194853051        |
| GSH          | GSTM4 | rs650985  | 0.77300758   | 0.349980772 | 0.744281079  | 0.317019519 | 0.972750995 | 0.981262976 | 0.317019519        |
| GSH          | GSTA4 | rs654144  | 1.660469272  | 0.011356464 | 1.691097867  | 0.014926866 | 2.799013864 | 0.233276685 | <b>0.011356464</b> |
| GSH          | GSTA2 | rs6577    | 1.01289216   | 0.963536968 | 1.061679859  | 0.837254538 | 2.28E-06    | 0.978164843 | 0.837254538        |
| GSH          | GCLC  | rs670548  | 0.865575556  | 0.26638687  | 0.761812643  | 0.1263107   | 0.991497913 | 0.972995256 | 0.1263107          |
| Inflammation | PTGS2 | rs689470  | 0.3024826999 | 0.007032565 | 0.3024826999 | 0.007032565 | NA          | NA          | <b>0.007032565</b> |
| GSH          | GSTA4 | rs6904769 | 0.928606349  | 0.705196374 | 0.993385911  | 0.976045432 | 0.399251058 | 0.250005218 | 0.250005218        |
| GSH          | GSTA4 | rs6904771 | 0.28429919   | 0.595854174 | 1.143748857  | 0.800537474 | NA          | NA          | 0.595854174        |
| DNA          | MGMT  | rs7068301 | 1.084218799  | 0.508889862 | 1.223546695  | 0.26728157  | 0.957233558 | 0.851900862 | 0.26728157         |
| DNA          | MGMT  | rs7073225 | 0.928374835  | 0.60603024  | 0.886880766  | 0.506172827 | 1.011537663 | 0.974413395 | 0.506172827        |
| DNA          | MGMT  | rs7080419 | 1.020063188  | 0.867352314 | 0.924176559  | 0.666928506 | 1.179567612 | 0.427597176 | 0.427597176        |
| DNA          | MGMT  | rs7087131 | 1.116576377  | 0.499922125 | 1.076114921  | 0.697652793 | 1.679959997 | 0.28471181  | 0.28471181         |
| DNA          | MGMT  | rs7097039 | 0.933582171  | 0.69352146  | 0.885430659  | 0.552743992 | 1.186889078 | 0.734456094 | 0.552743992        |
| DNA          | MGMT  | rs7099068 | 0.919928403  | 0.499096014 | 0.850651593  | 0.382794957 | 0.960986981 | 0.85557762  | 0.382794957        |
| DNA          | PARP  | rs7140044 | 0.961862897  |             |              |             |             |             |                    |

|     |       |           |             |             |             |             |             |             |                    |
|-----|-------|-----------|-------------|-------------|-------------|-------------|-------------|-------------|--------------------|
| DNA | MGMT  | rs913119  | 1.064581741 | 0.618393954 | 1.073679636 | 0.714912701 | 1.100389004 | 0.654169582 | 0.618393954        |
| GSH | GSTM5 | rs929166  | 0.958195821 | 0.756444137 | 0.922813243 | 0.645192583 | 1.038840979 | 0.903983613 | 0.645192583        |
| GSH | ABCC4 | rs943288  | 0.756491517 | 0.140059246 | 0.726720687 | 0.12739331  | 0.760734494 | 0.684310304 | 0.12739331         |
| GSH | GSTA3 | rs9474339 | 0.606241883 | 0.375098981 | 0.606241883 | 0.375098981 | NA          | NA          | 0.375098981        |
| DNA | PARP  | rs9507355 | 1.071217205 | 0.573477459 | 1.283552621 | 0.203918402 | 0.912555634 | 0.666989281 | 0.203918402        |
| DNA | PARP  | rs9511308 | 1.052489267 | 0.722793007 | 1.083516347 | 0.647051333 | 0.976368013 | 0.950548966 | 0.647051333        |
| GSH | ABCC4 | rs9516530 | 0.949019997 | 0.703707152 | 0.918024258 | 0.623842794 | 1.003659478 | 0.990941649 | 0.623842794        |
| GSH | ABCC4 | rs9516546 | 0.784664328 | 0.081398999 | 0.69124249  | 0.035677427 | 0.919355742 | 0.790639045 | <b>0.035677427</b> |
| GSH | ABCC4 | rs9524821 | 0.990110479 | 0.937221328 | 1.038385149 | 0.838082325 | 0.903354002 | 0.674532263 | 0.674532263        |
| GSH | ABCC4 | rs9524822 | 1.212307239 | 0.21853236  | 1.223569916 | 0.275539207 | 1.498406398 | 0.36956218  | 0.21853236         |
| GSH | ABCC4 | rs9524858 | 0.866418092 | 0.269178182 | 0.80756809  | 0.222676397 | 0.887922304 | 0.656849506 | 0.222676397        |
| GSH | ABCC4 | rs9524885 | 1.582218632 | 0.100906552 | 1.646514016 | 0.085351309 | 1.14E-05    | 0.979375047 | 0.085351309        |
| GSH | ABCC4 | rs9561784 | 1.256103424 | 0.096007369 | 1.140284091 | 0.452637746 | 2.181956795 | 0.010573321 | <b>0.010573321</b> |
| GSH | ABCC4 | rs9561797 | 0.962731162 | 0.78099653  | 0.9008628   | 0.55009524  | 1.132061042 | 0.678912806 | 0.55009524         |
| DNA | PARP  | rs9578747 | 0.916095008 | 0.658705289 | 0.898476958 | 0.614884222 | 1.108079171 | 0.904291291 | 0.614884222        |
| DNA | PARP  | rs9581094 | 0.799461214 | 0.214189829 | 0.769296798 | 0.180134078 | 0.953704346 | 0.944241885 | 0.180134078        |
| GSH | ABCC4 | rs9590216 | 0.791071727 | 0.198003702 | 0.755289821 | 0.153283155 | 1.074166841 | 0.916582001 | 0.153283155        |
| DNA | RAD52 | rs9634161 | 0.846168842 | 0.32352811  | 0.855266655 | 0.41720546  | 0.603036295 | 0.380273236 | 0.32352811         |
| GSH | ABCC4 | rs9634642 | 0.749657426 | 0.021304894 | 0.739067448 | 0.098165058 | 0.595254877 | 0.030757065 | <b>0.021304894</b> |
| GSH | GPX6  | rs974334  | 0.894326104 | 0.505098068 | 0.908918466 | 0.619800722 | 0.659927002 | 0.463043536 | 0.463043536        |
| DNA | MLH1  | rs9852378 | 1.040083864 | 0.758282432 | 1.136344872 | 0.50493317  | 0.943307513 | 0.799538435 | 0.50493317         |
